1           **PP2A-Cdc55 phosphatase coordinates actomyosin ring contraction and**  
2                                   **septum formation during cytokinesis**

3  
4 Yolanda Moyano-Rodríguez<sup>1</sup>, Odena Vilalta-Castany<sup>1</sup>, Magdalena Foltman<sup>2,3</sup>, Alberto  
5 Sanchez-Diaz<sup>2,3</sup> and Ethel Queralt<sup>1,\*</sup>

6  
7 <sup>1</sup>Cell Cycle Group, Institut d'Investigacions Biomèdica de Bellvitge (IDIBELL), Av.  
8 Gran Via de L'Hospitalet 199-203, 08908 L'Hospitalet de Llobregat, Barcelona,  
9 Spain.

10  
11 <sup>2</sup>Instituto de Biomedicina y Biotecnología de Cantabria, Universidad de Cantabria,  
12 CSIC, Santander, Spain

13  
14 <sup>3</sup>Departamento de Biología Molecular, Facultad de Medicina, Universidad de  
15 Cantabria, Santander, Spain

16  
17  
18  
19  
20  
21  
22 \*Correspondence/lead contact: [equeralt@idibell.cat](mailto:equeralt@idibell.cat), telephone +34932607128, fax  
23 +34932607219. ORCID: 0000-0003-0045-0039

24  
25  
26 Running head: New PP2A-Cdc55 role in cytokinesis

27  
28 Keywords: Cell Cycle, cytokinesis, PP2A-Cdc55, ingression progression complexes  
29 (IPC), AMR contraction, septum formation

## 30 **Summary**

31 Eukaryotic cells divide and separate all their components after chromosome  
32 segregation by a process called cytokinesis to complete cell division. Cytokinesis is  
33 regulated by exclusive elements of the process, and by some mitotic exit  
34 regulators. The mitotic kinases Cdc28-Clb2, Cdc5, and Dbf2-Mob1 phosphorylate  
35 cytokinetic proteins in budding yeast, but very little is known about the phosphatases  
36 regulating cytokinesis. The PP2A-Cdc55 phosphatase regulates mitosis  
37 counteracting Cdk1- and Cdc5-dependent phosphorylations. This prompted us to  
38 propose that PP2A-Cdc55 could also regulate cytokinesis by counteracting the  
39 mitotic kinases. Here, we demonstrate by in vivo and in vitro assays that PP2A-  
40 Cdc55 dephosphorylates the F-BAR protein Hof1 and the chitin synthase Chs2, two  
41 components of the Ingression Progression Complexes (IPC) involved in cytokinesis  
42 regulation. Primary septum formation and actomyosin ring contraction are impaired  
43 in absence of PP2A-Cdc55. Interestingly, the non-phosphorylatable version of Chs2  
44 rescue the asymmetric AMR contraction observed in absence of Cdc55, indicating  
45 that timely dephosphorylation of the IPC proteins by PP2A-Cdc55 is crucial for  
46 proper actomyosin ring contraction and septum formation. These findings reveal a  
47 new mechanism of cytokinesis regulation by the PP2A-Cdc55 phosphatase and  
48 extend our knowledge in the involvement of multiple phosphatases during  
49 cytokinesis.

50

## 51 **Introduction**

52 Cytokinesis is the final event of the cell cycle and mediates the physical separation  
53 of mother and daughter cells. It is a highly ordered and regulated process that is  
54 conserved among eukaryotes. The genome, packed into chromosomes, is

55 distributed between two daughter cells during anaphase. Cytokinesis must be  
56 spatially and temporally coordinated with sister chromatid segregation. Cytokinesis  
57 failure and the subsequent generation of aneuploidies have been associated with  
58 tumorigenesis [1]. Detailed mechanistic studies are important if we want to  
59 understand its normal cellular functions as well as its impact on human diseases.  
60 In fungi and animal cells, the cytokinetic machinery comprises two major elements:  
61 septins and a contractile actomyosin ring. In *Saccharomyces cerevisiae*, the process  
62 takes place at the division site, a narrow region linking mother and daughter cells. At  
63 the end of G1, the Cdc42 GTPase polarizes actin cables and patches towards the  
64 new bud site, and the septin ring is assembled [2,3]. The septin ring is reorganized  
65 later in S phase and becomes an hourglass-like structure [4] that splits into two rings  
66 at anaphase [5–7]. Septin serve as an anchor for various cytokinesis-related proteins  
67 including the type II myosin heavy chain, Myo1 [8]. Myo1, together with actin  
68 filaments and the essential and regulatory myosin light chains Mlc1 and Mlc2, shape  
69 the actomyosin ring (AMR)[5,8–10]. The AMR leads to the furrow ingression as a  
70 consequence of the contraction and constriction of the Myo1-actin layer [11,12].  
71 At the AMR localize some regulators of the cytokinesis as Iqg1 and Hof1, which, in  
72 turn, promotes the recruitment of Inn1 and Cyk3 [6,13–15]. These proteins are part  
73 of the Ingression Progression Complexes (IPCs)[16,17], which mediate the activation  
74 of the chitin synthase Chs2 [6,16,18,19]. Chs2 synthesizes the primary septum (PS)  
75 concomitantly with the AMR constriction [20,21]. Primary septum formation is tightly  
76 coupled to actomyosin ring contraction and ingression of the plasma membrane at  
77 the division site [22]. The IPCs form the central machinery required to coordinate  
78 those cytokinetic events [16]. Defects associated with one of the processes can  
79 perturb the others [18,23–25].

80 Once PS has been synthesized, the two secondary septa (SS) will be formed by  
81 Chs3, glucan synthases (Fks1) and mannosyltransferases on both sides of the PS  
82 [21,26,27]. Finally, cytokinesis is completed when the daughter cell synthesizes  
83 hydrolases and chitinases to hydrolyze the remaining cell wall structures in between  
84 the SS [28].

85

86 We know little about what regulates the timing of cytokinesis, and the mechanism  
87 ensuring it only happens after anaphase is complete is poorly understood. Anaphase  
88 is regulated by two pathways: FEAR (cdcFourteen Early Anaphase Release) and  
89 MEN (Mitosis Exit Network). Both are coordinated to promote the activation of the  
90 Cdc14 phosphatase [29–32]. Cdc14 is responsible for Cdk1 (Cdc28 in budding  
91 yeast) inactivation and the dephosphorylation of Cdk1 targets during mitosis [33].  
92 Several MEN kinases have been found to be involved in cytokinesis [34]. Polo-like  
93 kinase, Cdc5 regulates AMR formation and membrane ingression [35,36]. Dbf2, the  
94 downstream MEN kinase, phosphorylates Hof1 promoting its mobilization from the  
95 septins to the AMR [7,35]. By contrast, Cdc28-Clb2 inhibits AMR formation and  
96 contraction by delaying Hof1 localization at the AMR [37], limiting the actin  
97 recruitment by Iqg1, and keeping Chs2 at the endoplasmic reticulum (ER). Chs2  
98 translocates to the division site upon Chs2 dephosphorylation by Cdc14 [38,39].  
99 Cdk1 also inhibits Iqg1 and Inn1 localization at the division site, and Inn1 interaction  
100 with IPCs [37,40,41]. However, the inactivation of Cdc28-Clb2 activity during late  
101 anaphase is not sufficient to trigger cytokinesis [39,42], it is also necessary the  
102 Cdc14-dependent dephosphorylation of Iqg1, Inn1 and Chs2 for cytokinesis  
103 completion [39,41,43,44]. However, recent work demonstrates that multiple  
104 phosphatases shape the phospho-proteome during mitotic exit [45,46], pointing out

105 to the redundant contribution of other phosphatases such as PP2A<sup>Rts1</sup> and PP2A<sup>Cdc55</sup>  
106 with Cdc14 [45]. These observations suggest that PP2A phosphatases could also be  
107 required for cytokinesis.

108

109 PP2A<sup>Cdc55</sup> is a family of serine/threonine phosphatases conserved throughout  
110 eukaryotes. It is found as a heterodimer or heterotrimer composed of a scaffold  
111 subunit (Tpd3 in yeast), a catalytic subunit (Pph21/22) and a regulatory subunit  
112 (Cdc55 or Rts1)[47,48]. The regulatory subunit confers substrate specificity and  
113 regulates the phosphatase subcellular localization. PP2A<sup>Cdc55</sup> regulates the cell cycle  
114 in different ways: it controls bud polarization and cell wall synthesis [49,50], prevents  
115 sister chromatid separation [51], regulates the entry into mitosis [52,53] and the  
116 spindle assembly checkpoint [54], dephosphorylates Net1 during mitosis [55,56], and  
117 keeps MEN inhibited by dephosphorylating Bfa1[57].

118

119 MEN and Cdc14 phosphatase initiate cytokinesis by counteracting Cdk1  
120 dephosphorylation in budding yeast [44]. Here, we propose that a second  
121 phosphatase, PP2A<sup>Cdc55</sup>, regulates cytokinesis through the dephosphorylation of IPC  
122 proteins. We have found that the PP2A<sup>Cdc55</sup> participates in the regulation of the  
123 phosphorylation state of Hof1, Inn1, Cyk3 and Chs2 *in vivo* and dephosphorylates  
124 Hof1 and Chs2 *in vitro*. Interestingly, *cdc55Δ* mutants are defective in AMR  
125 contraction and Primary and Secondary Septa formation, supporting a role for  
126 PP2A<sup>Cdc55</sup> regulating cytokinesis. In the absence of Cdc55, AMR collapses in one  
127 side of the division site and the PS formation occurs asymmetrically only on one side  
128 of the bud neck. In conclusion, PP2A<sup>Cdc55</sup> coordinates AMR contraction and PS  
129 formation via the dephosphorylation of IPC proteins during cytokinesis.

130

131

## 132 **Results**

### 133 **PP2A<sup>Cdc55</sup> regulates the dephosphorylation of IPC proteins**

134 In a previous SILAC-based phosphoproteomics analysis performed in our laboratory  
135 we identified two IPC proteins, Iqg1 and Inn1, that were hyperphosphorylated in the  
136 absence of Cdc55, suggesting that they could be dephosphorylated by PP2A<sup>Cdc55</sup>  
137 [58]. We envisaged that PP2A<sup>Cdc55</sup> may have a role during cytokinesis being the  
138 dephosphorylation of the IPC proteins the possible link between PP2A<sup>Cdc55</sup> and  
139 cytokinesis. This prompted us to confirm a possible regulation of the IPC proteins by  
140 PP2A<sup>Cdc55</sup>.

141 It has previously been reported that mutants in the IPC subunits, for instance, *hof1Δ*  
142 and *cyk3Δ*, are synthetic lethal (SL)[59]. For this reason, we investigated the genetic  
143 interactions between *cdc55Δ* and IPC mutants. We tried to prepare double-deletion  
144 mutants with *cdc55Δ* and the non-essential IPC genes, *cyk3Δ* and *hof1Δ*, but the  
145 diploid cells did not sporulate and we were unable to obtain tetrads. Adopting  
146 another approach, we prepared double mutants with *cdc55Δ* and degron-conditional  
147 mutants to induce protein degradation for the IPC subunits [16,60]. We observed no  
148 differences in cell growth among the different mutant strains on control plates  
149 compared with WT cells (Fig. 1a). However, the viability of the double mutants,  
150 *cdc55Δ hof1-aid* and *cdc55Δ td-cyk3-aid*, was impaired under restrictive conditions  
151 (presence of auxin) compared with single mutants (Fig. 1a). The synthetic sick  
152 interactions found between *cdc55Δ* and *hof1-aid* or *td-cyk3-aid* degron mutants  
153 indicate that Cdc55 is functionally related to the IPC subunits, Hof1 and Cyk3, and  
154 suggest that Cdc55 could regulate the function of Hof1 and Cyk3.

155

156 To study the functional link between Cdc55 and the IPCs, we studied whether  
157 PP2A<sup>Cdc55</sup> regulates the dephosphorylation of IPC proteins. We analyzed the  
158 phosphorylation status of the IPC proteins Myo1, Iqg1, Hof1, Cyk3 and Chs2 in the  
159 absence of Cdc55 during cytokinesis. To analyze the phosphorylation of the proteins  
160 during cytokinesis, we synchronized cells at metaphase and released them  
161 synchronously into anaphase in order to visualize the phosphorylation of the IPC  
162 proteins during anaphase. Cells were arrested in metaphase by the depletion of the  
163 APC coactivator Cdc20 under the control of the methionine-responsive *MET3*  
164 promoter and released them into anaphase by re-introduction of Cdc20. The  
165 phosphorylation level of the IPC proteins was determined using Phos-tag™ gels.  
166 DNA content measured by flow-cytometry and mitotic spindle staining determined by  
167 tubulin immunofluorescence were used as markers of cell-cycle progression. Cdc14  
168 release from the nucleolus was also determined as control of mitosis progression.  
169 Cdc14 was prematurely release in metaphase in absence of Cdc55 as previously  
170 published [56].

171 A unique Myo1 band was resolved in the protein gel in WT and *cdc55*Δ cells, (Fig.  
172 S1a). Therefore, no phosphorylation isoforms were detected for Myo1 during  
173 anaphase, at least as far as it could be detected by western blot analysis. Next, we  
174 analyzed the phosphorylation pattern of Iqg1. It was suggested that Iqg1 is  
175 phosphorylated by Cdk1, since its localization and function depend on the Cdk1-  
176 phosphorylation sites [40,43]. However, Iqg1 phosphorylation levels during the cell  
177 cycle have not previously been reported. Here, we show how Iqg1 is phosphorylated  
178 and dephosphorylated during progression through mitosis. In wild-type cells, Iqg1  
179 was phosphorylated in metaphase, became dephosphorylated during anaphase (Fig.

180 S1a 20-30 min) and was quickly phosphorylated in telophase/cytokinesis (Fig. S1a  
181 40-50 min). In *cdc55*Δ mutant cells, the dephosphorylation events in anaphase and  
182 cytokinesis were observed although with lower efficiency than in WT cells (Fig. S1a,  
183 40-70 minutes). While Iqg1 phosphorylation was higher in *cdc55*Δ mutant cells  
184 during anaphase compare to WT cells, the slight differences observed between WT  
185 and *cdc55*Δ cells in cytokinesis are not significant enough to conclude that there is  
186 an increase in Iqg1 phosphorylation in the absence of Cdc55.

187

188 Subsequently, in wild-type strains, we observed that Hof1 and Inn1 were  
189 phosphorylated after 30 min, corresponding to the time of anaphase (Figs. 1b and c).  
190 This phosphorylation is involved in the regulation of both proteins [37,41,61]. After  
191 anaphase, Hof1 and Inn1 are quickly dephosphorylated. Cdc14 dephosphorylates  
192 Inn1 [41], but to our knowledge no phosphatase has been described in the context of  
193 Hof1 dephosphorylation. In *cdc55*Δ cells, although slower-migrating isoforms of Inn1  
194 and Hof1 were detected, the phosphorylation levels were similar to WT cells during  
195 metaphase and early anaphase. While anaphase hyperphosphorylation occurred  
196 normally, interestingly, Hof1 and Inn1 remained hyperphosphorylated during late  
197 anaphase and cytokinesis, unlike the control cells (Figs. 1b and c, 50-90 min). These  
198 results suggest that PP2A<sup>Cdc55</sup> participates in the dephosphorylation of Inn1 and  
199 Hof1 during late anaphase/cytokinesis.

200

201 Cyk3 has recently been reported to be phosphorylated upon MEN activation  
202 concomitantly with Hof1 [19]. In control cells, Cyk3 started to be phosphorylated in  
203 anaphase (Fig. 1d, 30 min) and this phosphorylation was maintained until G1. In  
204 *cdc55*Δ mutant cells, on the other hand, the phosphorylation was already present in



205 metaphase and increased at anaphase (Fig. 1d; 40 min), indicating that Cyk3 is  
206 slightly hyperphosphorylated in the absence of Cdc55 during anaphase. Although  
207 the Cyk3 phosphorylation during cytokinesis was similar in presence and absence of  
208 Cdc55. This result suggests that PP2A<sup>Cdc55</sup> might control the state of  
209 phosphorylation of Cyk3, especially during mitosis but not during cytokinesis.  
210 Finally, the state of Chs2 phosphorylation was analyzed as the final IPC effector.  
211 Chs2 presented many different migrating bands and it was described that Chs2 has  
212 different post-translational modifications. For this reason, we performed an alkaline  
213 phosphatase experiment to check which correspond to phosphorylations (Fig. S1b).  
214 In presence of alkaline phosphatase, the slower Chs2 migrations bands collapse into  
215 the faster migration band indicating that mostly the upper bands are phosphorylation  
216 events. Chs2 protein presented slow migration isoforms during metaphase and early  
217 anaphase in control cells (Fig. 1e meta-20 min). Chs2 phosphorylation in metaphase  
218 is important for retaining Chs2 in the ER [38,39,62]. From anaphase until early G1  
219 (Fig. 1e; 30-50 min), Chs2 faster migration isoforms were detected with slower-  
220 migrating isoforms accumulating again later on (Fig. 1e; 60-90 min). Remarkably, in  
221 *cdc55Δ* mutant cells the slower-migrating isoforms are detectable throughout the  
222 time-course, indicating that Chs2 was not efficiently dephosphorylated during late  
223 anaphase/cytokinesis (Fig. 1e; 40-70min). We can conclude that Chs2  
224 phosphorylation levels are altered in the absence of Cdc55 during cytokinesis.  
225  
226  
227 The previous results suggest that PP2A<sup>Cdc55</sup> phosphatase counteracts Hof1, Inn1,  
228 Cyk3 and Chs2 phosphorylation. To determine whether these IPC proteins are  
229 PP2A<sup>Cdc55</sup> substrates, we examined whether they physically interact with Cdc55 by

230 carrying out co-immunoprecipitation experiments. In Cdc55 immunoprecipitates,  
231 from cells released into synchronous anaphase by Cdc20 depletion and re-induction,  
232 we detected co-purification of Cyk3, Inn1, Hof1, and Chs2 during anaphase and  
233 cytokinesis (Fig. 1f). These results indicate that PP2A<sup>Cdc55</sup> and Cyk3, Inn1, Hof1, and  
234 Chs2 could physically interact and that these interactions would occur during  
235 progression through mitosis and cytokinesis. Taken together, these results suggest  
236 that Cyk3, Inn1, Hof1, and Chs2 are likely to be an *in vivo* substrate of PP2A<sup>Cdc55</sup>.  
237

### 238 **PP2A<sup>Cdc55</sup> dephosphorylates Hof1 and Chs2 *in vitro***

239 To explicitly test whether Inn1, Hof1, Cyk3 and Chs2 are direct PP2A<sup>Cdc55</sup>  
240 dephosphorylation targets, we measured PP2A<sup>Cdc55</sup> *in vitro* phosphatase activity in  
241 assays after Cdc55 immunopurification from metaphase-arrested cells when  
242 PP2A<sup>Cdc55</sup> is active [56]. The substrates were recombinant fragments of Cyk3 (full  
243 length), Inn1 (full length), Hof1 (full length) and Chs2 (1-629) purified from *E. coli*. To  
244 perform the phosphatase assays, the substrates first had to be phosphorylated.  
245 Cdk1 and MEN kinases were used, as they are the most relevant regulatory kinases  
246 of the IPC [35,37,61]. Unfortunately, no Cyk3 phosphorylation was observed in  
247 kinase assays using Clb2-Cdk1, Cdc5, Cdc15, and Dbf2 as kinases. Therefore, no  
248 phosphatase assay for Cyk3 could be performed. A weak Inn1 phosphorylation  
249 event was observed in Clb2-Cdk1 kinase assays after very long exposure times (Fig.  
250 S2a). However, this Inn1 phosphorylated substrate did not have enough signal to be  
251 able to proceed with the phosphatase assay. Clb2-Cdk1, Cdc5, and Dbf2 are known  
252 to phosphorylate Hof1 [7,35], so we phosphorylated Hof1 with the three kinases.  
253 However, we only detected Hof1 phosphorylation in Clb2-Cdk1 kinase assays (Fig.  
254 S2b). Finally, Chs2 kinase assays were performed with Clb2-Cdk1 and Dbf2 and

255 Chs2 was phosphorylated with both kinases (Fig.S2c) as previously described  
256 [38,39,63].  
257 *In vitro* <sup>32</sup>P-phosphorylated Hof1 and Chs2 were used as substrates for the  
258 phosphatase assays. Cdc55 immunoprecipitates were incubated with these  
259 substrates and the reduction of <sup>32</sup>P-phosphorylated proteins was determined. Clb2-  
260 Cdk1-phosphorylated Hof1 and Chs2 and Dbf2-phosphorylated Chs2 were  
261 incubated with the Cdc55 immunoprecipitates from control cells expressing Cdc55  
262 and a *cdc55-ED* inactive version of PP2A<sup>Cdc55</sup> [64] from metaphase-arrested cells.  
263 Using Hof1 as a substrate, Hof1 phosphorylation signal intensity was statistically  
264 significant reduced by 59% in the assay with PP2A<sup>Cdc55</sup> (Fig. 2a). By contrast, Hof1  
265 was not dephosphorylated in the inactive-version PP2A<sup>cdc55-ED</sup> (Fig. 2a). These  
266 results demonstrate that PP2A<sup>Cdc55</sup> dephosphorylates Hof1 *in vitro*, confirming that  
267 Hof1 is its substrate. To our knowledge, this is the first time a phosphatase has been  
268 described to dephosphorylate Hof1.  
269  
270 When using Chs2 as a substrate, the PP2A<sup>Cdc55</sup> phosphatase assays for Cdk1- and  
271 Dbf2-phosphorylated Chs2 showed a strong decrease in the Chs2 phosphorylation  
272 signal (Fig. 2b). A reduction of 84% in the Chs2 phosphorylation signal was noted in  
273 the case of Cdk1-phosphorylated Chs2 and a 38% reduction in Dbf2-phosphorylated  
274 Chs2, reflecting the higher dephosphorylating ratios for Cdk1-phosphorylated  
275 residues. The *cdc55-ED* mutant version was not able to dephosphorylate any  
276 phosphorylated Chs2 significantly. These results strongly suggest that Chs2 is  
277 dephosphorylated *in vitro* by PP2A<sup>Cdc55</sup>, confirming that Chs2 is also a PP2A<sup>Cdc55</sup>  
278 substrate.

279 In conclusion, the phosphatase assays indicate that PP2A<sup>Cdc55</sup> counteracts  
280 phosphorylation in Hof1 and Chs2, reinforcing the idea that they are direct PP2A<sup>Cdc55</sup>  
281 substrates. PP2A<sup>Cdc55</sup> is known to counteract Cdk1 phosphorylation, but this is the  
282 first time, to our knowledge, that a Dbf2 substrate has been shown to be  
283 dephosphorylated by PP2A<sup>Cdc55</sup>.

284

### 285 **Defective septum formation in the absence of Cdc55**

286 Based on the multi-nuclear phenotype of the *cdc55Δ* deletion mutant at low  
287 temperatures, it has been suggested that PP2A<sup>Cdc55</sup> phosphatase is involved in  
288 cytokinesis [47]. This prompted us to study the cytokinesis phenotypes of the *cdc55Δ*  
289 mutant cells.

290 Septins are GTP-binding proteins that act as scaffold platforms for many proteins  
291 and impose a diffusion barrier for regulating cell polarity, cell remodeling and  
292 cytokinesis. Septins are recruited at the bud site during late G1 [65,66]. Upon  
293 assembly, they form a ring-like structure at the division site. This structure has a  
294 dynamic septin organization that becomes stabilized when the definitive collar or  
295 hourglass-like structure is acquired during late anaphase [4]. This collar becomes  
296 reorganized into two rings at the onset of cytokinesis [67,68]. Once cytokinesis is  
297 completed, and just before next cycle septins are recruited, septins are  
298 disassembled from the division site [4,65,69]. We wondered whether septin  
299 structures were defective in the absence of Cdc55. Septins were visualized *in situ* by  
300 immunofluorescence staining of Cdc11 and Shs1-HA in asynchronous cells. The  
301 septin structures, septin rings, collar and double rings, were indistinguishable  
302 between *cdc55Δ* and wild-type cells (Fig. S3), suggesting that septin dynamics might  
303 not be greatly affected by the absence of Cdc55.

304

305 PP2A<sup>Cdc55</sup> is involved in bud morphology through actin polarization and cell-wall  
306 synthesis [50]. Polarized growth must be temporally coordinated with the events of  
307 the cell cycle. Actin cytoskeleton polarization at the site of bud emergence is  
308 triggered at Start by the kinase activities of Cln1,2-Cdc28. In addition, Clb2-Cdc28  
309 restrains repolarization to the mother bud neck [70]. Only when the Clb2-Cdc28  
310 kinase is inactivated at the end of mitosis, the actin cytoskeleton is directed to the  
311 neck to complete cytokinesis. Actin is then recruited in an Iqg1-dependent manner to  
312 the division site and it is essential for the formation of the AMR [9,43]. We envisage  
313 the possibility that PP2A<sup>Cdc55</sup> affects actin cytoskeleton polarization, not only during  
314 the period of apical growth, but also at the end of mitosis. For this reason, we  
315 wondered whether actin polarization was defective in *cdc55Δ* cells. To examine this  
316 possibility, actin filaments were stained with rhodamine-labelled phalloidin in cells  
317 progressing through mitosis and cytokinesis. Actin signal was found to be  
318 depolarized in metaphase-arrested cells both in the wild-type and *cdc55Δ* strains, as  
319 expected (Fig. S4a). When cells completed mitosis, wild-type cells polarized the  
320 actin cytoskeleton to the division site. In *cdc55Δ* mutants, actin was also repolarized  
321 in a timely manner at the division site during cytokinesis (Fig. S4a). However, in a  
322 subpopulation of *cdc55Δ* cells, actin polarization at the new bud was observed  
323 before cytokinesis had been completed (Fig. S4b). We were able to observe actin  
324 signals simultaneously at the division site during cytokinesis and at the new bud site  
325 in 12.5% of *cdc55Δ* mutant cells, whereas there was no premature actin  
326 repolarization at the new bud site in wild-type cells (Fig. S4b). The premature actin  
327 localization indicates that actin re-polarization of the next cell cycle occurs before cell

328 division in a fraction of *cdc55Δ* cells. Therefore, PP2A<sup>Cdc55</sup> could act to prevent actin  
329 re-polarization until cytokinesis is completed.

330

331 Cytokinesis in budding yeast is accomplished by the concerted action of the  
332 actomyosin contractile ring (AMR) and the formation of the septum. We investigated  
333 how these two processes occur in the absence of Cdc55. First, to clarify whether the  
334 actomyosin contractile ring is functional, we analyzed the localization of a Myo1-  
335 tdTomato fusion protein in cells progressing through mitosis and cytokinesis by the  
336 synchronous release from the metaphase arrest by Cdc20 depletion. It has been  
337 described that Myo1 localizes to the division site immediately after budding, so in  
338 metaphase-arrested cells Myo1-tdTomato was localized at the bud neck in control  
339 cells. Similarly, Myo1-tdTomato was detected at the bud neck at metaphase in  
340 *cdc55Δ* strains. The signal size is reduced during anaphase, reflecting the  
341 contraction of the AMR, until the signal becomes a single dot and finally disappears  
342 (Fig. 3a). The dynamics of AMR contraction are similar in the two strains (6 minutes  
343 from the start of contraction to the disappearance of the signal), but the “dot” signal  
344 collapsed to one side of the division site in almost all the *cdc55Δ* cells (Fig. 3b  
345 *cdc55Δ*). We observed that the AMR contraction was asymmetric with respect to the  
346 centripetal axis in 96% (N=30) of *cdc55Δ* cells (Fig. 3b). In order to check whether  
347 the asymmetric Myo1 signal is not due to an adaptive mechanism of the *cdc55Δ*  
348 deletion mutant cells, we investigated the Myo1 contraction after inducing the Cdc55  
349 degradation during metaphase using an auxin-degradation system[71]. We observed  
350 that after the degradation of Cdc55, Myo1 contraction was asymmetric (86% of cells)  
351 as in *cdc55Δ* cells (Fig. 3c). The results indicate that the lack of PP2A<sup>Cdc55</sup> activity  
352 promotes the asymmetric contraction of Myo1.

353 We next examined whether Myo1 asymmetry could also be detected in the inactive  
354 version of Cdc55 (*cdc55-ED*). We synchronized cells at the metaphase-anaphase  
355 transition by Cdc20 depletion and analyzed the contraction of the Myo1-tdTomato  
356 after the release. We observed that 65% of *cdc55-ED* mutant cells showed an  
357 asymmetric Myo1-tdTomato signal upon contraction (Fig. 3c). This result indicates  
358 that, similar to the absence of Cdc55, the non-functional Cdc55 results in the  
359 alteration of AMR contraction. Overall, we conclude that Myo1 recruitment and time  
360 of localization at the division site are not altered in the absence of Cdc55, although  
361 AMR contraction is defective in the absence of PP2A<sup>Cdc55</sup> activity. This asymmetric  
362 localization has been reported before in some IPC mutants [25] and suggests a  
363 dysfunctional AMR. These results demonstrate that PP2A<sup>Cdc55</sup> is required for the  
364 correct function of AMR and for an efficient cytokinesis.

365

366 To confirm that the asymmetric AMR contraction phenotype was not affected by the  
367 tdTomato-tagging or the synchronization method, we compared fixed *cdc55Δ* cells  
368 tagged with Myo1-GFP upon release from metaphase-arrested cells by Cdc20  
369 depletion with *cdc55Δ* cells tagged with Myo1-tdTomato synchronizing cells with  
370 alpha factor in G1. The *cdc55Δ* Myo1-GFP tagged cells showed an asymmetry of  
371 87.5% of the population (N=23) (Fig. S5), representing a similar phenotypic  
372 penetrance to that of Myo1-tdTomato in *cdc55Δ* cells. This asymmetry was not  
373 observed in WT cells (1 asymmetric cell in the 41 cells studied).

374 Next, we performed the assay synchronizing cells in G1 by alpha factor in absence  
375 of Cdc55. *cdc55Δ* cells enter mitosis with a delay due to compromised Cdk1 activity  
376 because of inhibitory Cdc28-Y19 phosphorylation [72]. To correct for this delay, we  
377 introduced the *cdc28\_Y19F* allele, which is refractory to Cdk1 inhibition. The *cdc55Δ*

378 cells containing *cdc28\_Y19F* progressed normally through mitosis upon release from  
379 metaphase-arrested cells [56]. Again, we observed that Myo1-tdTomato constriction  
380 was asymmetric in 80% of the *cdc55Δ cdc28\_Y19F* cell population (Fig. S5).  
381 Therefore, the asymmetric Myo1 signal in the absence of Cdc55 was observed  
382 independently of the epitope and the synchronization method used.  
383  
384 Then, chitin deposition in the neck was analyzed by *in vivo* staining with calcofluor  
385 white (a molecule that binds to chitin while it is being incorporated to the cell wall)  
386 and measured the fluorescence intensity of the incorporated calcofluor on living cells  
387 containing Myo1-tdTomato as a control of cytokinesis progression. We arrested cells  
388 at metaphase by Cdc20 depletion and released them into mitosis and took images  
389 30-45 min after the release when we found cells at cytokinesis. Calcofluor intensity  
390 was then measured and quantified in wild-type and *cdc55Δ* cells (Fig. 3d). There  
391 was a statistically significant reduction of the 45% in the intensity of the calcofluor  
392 staining in the absence of Cdc55 compared with control cells. Chitin is incorporated  
393 in primary septa (PS) and secondary septa (SS), so we cannot distinguish at which  
394 of them this reduction occurs. For this reason, we repeated the calcofluor staining in  
395 cells containing a deletion of *CHS3*, the chitin synthase responsible for secondary  
396 septum formation [21]. A reduction of 70% in the calcofluor intensity was observed in  
397 the absence of Cdc55 relative to control cells (Fig. 3d). The above results suggest  
398 that primary and secondary septum formation is reduced in cells lacking PP2A<sup>Cdc55</sup>  
399 activity. Our results suggest that, similar to IPCs, PP2A<sup>Cdc55</sup> has a role coordinating  
400 AMR contraction with septum formation, probably by dephosphorylating IPC  
401 components.  
402



403 To determine whether ingression of the plasma membrane could occur in *cdc55Δ*  
404 cells, we performed time-lapse video microscopy of cells expressing Myo1-tdTomato  
405 to follow AMR contraction, and the small G-protein Ras2 fused to 3 copies of GFP to  
406 study plasma membrane dynamics. The visualization of the plasma membrane at  
407 the site of division revealed no cytoplasm connection between mother and daughter  
408 cells, confirming that cytoplasmic division had been completed in control and *cdc55Δ*  
409 cells (Fig. S6). In conclusion, *cdc55Δ* cells have a defective AMR “collapsed” to one  
410 side of the division site and a reduction in septum formation, but nevertheless  
411 manage to complete cell division.

412

413 To confirm the defects in septum formation we investigated the cytokinetic structure  
414 by transmission electron microscopy (TEM). We synchronized cells at the  
415 metaphase-anaphase transition by Cdc20 depletion and captured images 40-50  
416 mins after metaphase release. Cells synthesizing the primary septum were identified  
417 and the structure of the septum was then examined. In wild-type cells, we observed  
418 that the PS formed on both sides of the membrane invagination (Fig. 4a), as  
419 expected. Once the PS was finished, the two SS was formed on both sides of the PS  
420 (Fig. 4b). Finally, the PS is degraded, and the cells physically separated (Fig. 4c).  
421 Conversely, in *cdc55Δ* cells, the PS formed on only one side of the division site (Fig.  
422 4d). From the cells performing primary septum formation, we quantified 85% (N=25)  
423 with asymmetric PS in absence of Cdc55. Some cells showed aberrant, thicker  
424 structures with diverse morphologies that resemble the remedial septa (Fig. 4e). The  
425 remedial septa were first described in IPC mutant cells, i.e., *myo1Δ* and *chs2Δ* [23].  
426 They are chitin structures reminiscent of SS that allow cells to complete cytokinesis

427 when the PS is defective [23,73]. Strikingly, in *cdc55*Δ cells, the mother and daughter  
428 cells are finally able to separate physically upon formation of the remedial septum.

429

430 To confirm that *cdc55*Δ cells can synthesize the remedial septa as a rescue  
431 mechanism to complete cell division, we repeated the experiments against a *chs3*Δ  
432 background in which no secondary septa were formed. Similar results to those of  
433 control cells containing Chs3 were obtained, whereby the *cdc55*Δ *chs3*Δ cells had  
434 asymmetric PS formation and a remedial septum was formed (Figs. 4j-l). This result  
435 suggests that remedial septum formation enables cytoplasm separation and cell  
436 division in the absence of Cdc55. The asymmetry seen in PS formation in *cdc55*Δ by  
437 EM and the asymmetric AMR contraction confirm that PP2A<sup>Cdc55</sup> ensures the correct  
438 coordination of the AMR contraction and PS formation.

439

440 **PP2A<sup>Cdc55</sup> regulates IPC symmetric localization and residence time at the**  
441 **division site**

442 IPC proteins form a complex whose function is to coordinate AMR contraction,  
443 plasma membrane ingression and PS formation [16,19]. Hyperphosphorylation of  
444 Hof1, Inn1, Cyk3, and Chs2 in the absence of Cdc55 could affect their recruitment to  
445 the division site. For this reason, we examined whether the absence of Cdc55  
446 disturbs the IPC subunits proper or timely localization at the division site. To do this,  
447 we established the localization of the IPC subunits by time-lapse microscopy in the  
448 absence of Cdc55. We arrested cells in metaphase by Cdc20 depletion and captured  
449 images every 2 minutes after synchronous release into anaphase by Cdc20 re-  
450 induction. Since Myo1-tdTomato has no difference in protein recruitment or  
451 residence time at the division site in the absence of Cdc55, we decided to use Myo1

452 dynamics as the internal control for the dynamics of AMR constriction when studying  
453 the localization of the other IPC proteins.

454 To determine whether PP2A<sup>Cdc55</sup> regulates IPC localization, we used GFP-tagged  
455 IPCs strains in controls and *cdc55*Δ cells. Consistent with the results from the Myo1  
456 protein, Iqg1, Hof1, Cyk3, Inn1, and Chs2 were contracted asymmetrically at the  
457 division site in *cdc55*Δ cells (Fig. 5a). These findings indicate that the lack of  
458 PP2A<sup>Cdc55</sup> activity provokes a collapse of the AMR, resulting in defective PS  
459 formation.

460

461 We then investigated the contraction and residence time of the IPC subunits. In  
462 anaphase, Iqg1-GFP was already present at the division site and Iqg1 contraction  
463 started mostly simultaneous with Myo1-tdTomato in WT and *cdc55*Δ mutant cells  
464 (Fig. S7a). Iqg1-GFP signal was also observed at similar times in WT and *cdc55*Δ  
465 cells (Fig. 5b), consistent with the Myo1 signal. No differences were observed in  
466 residence time at the bud neck in both strains, despite the higher dispersion of the  
467 values for the *cdc55*Δ mutant (Figs. 5b and S7a). These results indicate that Iqg1  
468 residence time is mostly normal in the absence of Cdc55.

469

470 Hof1-GFP was localized at the division site in metaphase cells as previously  
471 described [61]. In the main population of WT and *cdc55*Δ cells, the start of  
472 contraction was similar between Hof1 and Myo1 (Fig. S7b), indicating that the onset  
473 of contraction was normal in the absence of Cdc55. By contrast, we observed that  
474 the Hof1-GFP signal took longer to complete contraction and to disappear in *cdc55*Δ  
475 than it did in WT cells (Figs. 5b and Fig. S7b). We conclude that the absence of  
476 Cdc55 increases the residence time of Hof1 signal at the division site, further

477 demonstrating that cytokinesis is affected. The longer Hof1 localization at the  
478 division site is consistent with the collapsed AMR and the asymmetry of the IPC  
479 components.

480

481 The Cyk3-GFP signal appeared at the division site 0-2 minutes after the Myo1-  
482 tdTomato signal started to contract in WT and *cdc55* $\Delta$  cells, but the Cyk3 signal  
483 remained longer at the division site in the absence of Cdc55 (Figs. 5c and S7c).

484 These results suggest that Cyk3 localization dynamics are regulated by PP2A<sup>Cdc55</sup>.

485

486 On the other hand, Inn1-GFP appeared at the division site when Myo1-tdTomato  
487 started to contract in WT and *cdc55* $\Delta$  cells. The Inn1-GFP signal was detected at  
488 similar time in the WT and *cdc55* $\Delta$  mutant cells (Figs. 5c and Fig. S7d). We conclude  
489 that Inn1 contraction and residence time are not affected in absence of Cdc55.

490

491 Similar to Hof1 and Cyk3, the Chs2-GFP residence time in *cdc55* $\Delta$  mutant cells was  
492 longer. Chs2-GFP was recruited at the division site when the AMR started to  
493 contract in both WT and *cdc55* $\Delta$  cells. Conversely, the Chs2 signal lasted longer at  
494 the division site in *cdc55* $\Delta$  cells (Figs. 5c and S7e). Therefore, Cdc55 absence  
495 interferes with Chs2 contraction and its residence time at the division site. We can  
496 conclude that PP2A<sup>Cdc55</sup> is required for proper Chs2 localization dynamics.

497

498 **Timely Chs2 dephosphorylation by PP2A-Cdc55 is required for proper AMR**  
499 **contraction**

500 Our results suggest that Cdc55 regulates Hof1 and Chs2-dependent processes

501 during cytokinesis, and that these proteins are Cdc55 substrates. To screen for new

502 PP2A<sup>Cdc55</sup> substrates during mitosis, we previously performed a global study of the  
503 PP2A<sup>Cdc55</sup> phosphoproteome by a quantitative phosphoproteomic analysis based on  
504 SILAC labeling [58]. Wild-type cells were labeled using <sup>13</sup>C<sub>6</sub>-lysine and <sup>13</sup>C<sub>6</sub>-arginine  
505 (heavy), and *cdc55Δ* mutant cells were grown in the presence of unmodified arginine  
506 and lysine (light). Cells were arrested in metaphase and protein extracts were  
507 prepared. Phosphopeptides were enriched by TiSH-based enrichment.  
508 Phosphopeptide analysis of the heavy/light-labelled cells was done by LC-MS/MS.  
509 The screening revealed that a phosphopeptide corresponding to Chs2 protein was  
510 hyperphosphorylated in *cdc55Δ* mutant cells. The Chs2 peptide contained one Cdk1  
511 minimal S/TP site: S133 (Figure 6a). The phosphosite was detected with the highest  
512 confidence (pRS site probability 99.9% and p-value < 0.00001) and was also  
513 identified in a second phospho-proteomic study for *cdc55Δ* mutant cells [46]. This  
514 result confirms that Chs2 is a PP2A<sup>Cdc55</sup> substrate. The S133 is one of the 6 Cdk1  
515 consensus sites (S/T-P) previously reported to be phosphorylated by Cdk1 [74]. In  
516 addition, Chs2 S14, S60, S69 and S100 can be efficiently dephosphorylated by  
517 Cdc14 while the other two sites S86 and S133 can also be dephosphorylated by  
518 Cdc14 although less efficiently [39]. It is important to remember that Cdc14 is  
519 prematurely release from the nucleolus and active as a phosphatase in *cdc55Δ*  
520 mutant cells [56,57]. Therefore, despite the fact that the two phosphatases can  
521 contribute to the dephosphorylation of Chs2, in the phosphoproteomic analysis the  
522 identification of a hyperphosphorylated peptide in absence of Cdc55 implies that this  
523 site is not mainly affected by Cdc14 (the phosphosites mainly dephosphorylated by  
524 Cdc14 will be identified as hypophosphorylated since Cdc14 is prematurely active in  
525 *cdc55Δ* cells). To advance in the mechanistic understanding of the role of PP2A<sup>Cdc55</sup>

526 in cytokinesis we prepared phospho-mutants for Chs2 and determined the  
527 phenotypic effects of these mutations.  
528 To demonstrate that the cytokinetic defects observed in *cdc55*Δ mutant cells were  
529 due to the increase of Chs2 phosphorylation levels, we introduced the *chs2-6A-YFP*  
530 mutant, where all the SP sites were mutated to alanine [75], in *cdc55*Δ mutant cells.  
531 Myo1 and Chs2 signals were asymmetric in the presence of the control *CHS2-YFP*  
532 (79% of cells; N=13) in absence of Cdc55, as expected (Fig. 6b) Remarkably, in the  
533 *chs2-6A-YFP* non-phosphorylatable version Myo1 and Chs2 localization became  
534 symmetric in 78% of cells (N=18), indicating that the non-phosphorylatable *chs2-6A*  
535 mutant rescued the asymmetric localization of Myo1 in *cdc55*Δ mutant cells (Fig. 6b).  
536 The Chs2-YFP signal was detected earlier at the bud neck, probably due to the  
537 overexpression of Chs2, but the Myo1 and Chs2 contraction time were similar in the  
538 presence of Chs2 and *chs2-6A* (Fig. 6c). We can conclude that timely  
539 dephosphorylation of Chs2 by PP2A-Cdc55 is required for proper AMR contraction.

540  
541 These findings demonstrate that the lack of PP2A<sup>Cdc55</sup> activity provokes a collapse of  
542 the AMR, representative of a dysfunctional AMR, and that it also alters the residence  
543 time at the division site of IPC proteins. Therefore, PP2A<sup>Cdc55</sup> dephosphorylation of  
544 the IPC subunits is essential for maintaining proper AMR contraction and septum  
545 formation; both required for an efficient cytokinesis.

546  
547 **Discussion**

548 **PP2A<sup>Cdc55</sup> regulates IPC phosphorylation and its localization dynamics at the**  
549 **division site**

550 The localization and function of the IPC components (Iqg1, Myo1, Hof1, Cyk3, Inn1,  
551 and Chs2 proteins), which coordinate AMR contraction, plasma membrane  
552 ingress and PS formation, are tightly regulated by phosphorylation. To date, only  
553 two phosphatases, Cdc14 and PP2A<sup>Rts1</sup>, are known to have a role in cytokinesis  
554 [76], being just Cdc14 described to dephosphorylate some of the IPC proteins  
555 [39,41–43]. A putative role for PP2A<sup>Cdc55</sup> in cytokinesis was proposed because of its  
556 elongated morphology and multinucleated cells at low temperatures in *cdc55Δ* cells  
557 [47]. In addition, PP2A<sup>Cdc55</sup> is localized at the division site during cytokinesis [77].  
558 However, the role of PP2A<sup>Cdc55</sup> during cytokinesis was not demonstrated and the  
559 molecular mechanism by which PP2A<sup>Cdc55</sup> regulates cytokinesis is still unknown.  
560 Here, we describe a new function of PP2A<sup>Cdc55</sup> phosphatase in the regulation of  
561 cytokinesis. In summary, PP2A<sup>Cdc55</sup> regulates the dephosphorylation of IPC and is  
562 involved in proper AMR contraction and septum formation. PP2A<sup>Cdc55</sup>  
563 dephosphorylates Hof1 and Chs2 *in vivo* and *in vitro*, indicating that they are direct  
564 PP2A<sup>Cdc55</sup> targets. In addition, PP2A<sup>Cdc55</sup> also participates in the regulation of Cyk3  
565 and Inn1 phosphorylation. The defects seen in IPC residence time and asymmetric  
566 localization in the absence of Cdc55 may be a direct consequence of its own  
567 phosphorylation regulation by PP2A<sup>Cdc55</sup> or a secondary effect of the other IPC  
568 dephosphorylation by PP2A<sup>Cdc55</sup>. Both scenarios are plausible given that we  
569 demonstrated that at least two proteins, Hof1 and Chs2, are direct targets of  
570 PP2A<sup>Cdc55</sup>. In the case of Chs2, we have been able to demonstrate that the defects  
571 of AMR contraction in absence of Cdc55 are due to the increased levels of Chs2  
572 phosphorylation, since the *chs2-6A* non-phosphorylatable mutant rescue the  
573 asymmetric Myo1 signal in *cdc55* mutant cells. This result suggests that timely  
574 dephosphorylation of Chs2 by PP2A<sup>Cdc55</sup> is crucial for proper AMR contraction. Since

575 the IPC coordinates AMR constriction, plasma membrane ingression and septum  
576 formation, we propose that PP2A<sup>Cdc55</sup> is also involved in this efficient mechanism of  
577 coordination through IPC dephosphorylation (Fig. 7).

578

### 579 **The role of PP2A<sup>Cdc55</sup> during cytokinesis**

580 In the absence of Cdc55, Myo1 was constricted and unanchored in a timely fashion,  
581 but the constriction was displaced from the central axis, becoming asymmetric (Figs.  
582 3a and S5). This phenotype is characteristic of IPC mutants [6,25,67] and denotes a  
583 dysfunctional AMR.

584 Consistent with this, Iqg1, Cyk3, Hof1, Inn1, and Chs2 localization were also  
585 asymmetric upon AMR constriction (Fig. 5a). The asymmetric Cyk3 and Inn1  
586 localization have also been described in *hof1Δ* mutants [13,19]. Hof1  
587 dephosphorylation by PP2A<sup>Cdc55</sup> (Fig. 1b) may contribute to Hof1 functionality and to  
588 regulate Cyk3 residence time and asymmetry at the division site. On the other hand,  
589 Hof1 asymmetry was already described in *chs2Δ* cells [6]; but not *vice versa* [6,16].  
590 Therefore, PS formation by Chs2 influences Hof1 constriction. Consequently,  
591 PP2A<sup>Cdc55</sup> could regulate Hof1 constriction directly and/or through PS regulation,  
592 since both Hof1 and Chs2 are PP2A<sup>Cdc55</sup> substrates. Defective PS formation could  
593 also contribute to the asymmetry seen in the IPC proteins.

594

595 PP2A<sup>Cdc55</sup> also regulates septum formation. Chitin incorporation was decreased in  
596 the *cdc55Δ* and *cdc55Δ chs3Δ* cells (Fig. 3d), indicating that Chs2 activity might be  
597 impaired. The electron microscopy study of septum formation demonstrated that PS  
598 is still formed in *cdc55Δ* cells, being predominantly asymmetric on one side of the  
599 division site during its formation (Figs. 4d, j). PS was reported to be asymmetric in



600 around 50% of *hof1* $\Delta$  mutant cells [35]; while more than 80% of the cells showed  
601 asymmetric PS in *cdc55* $\Delta$  cells. This difference in magnitude can be explained taking  
602 into consideration that at least two IPC, Chs2 and Hof1, are PP2A<sup>Cdc55</sup> substrates.

603

604 Later on, a remedial septum is formed that contains even cytosol fractions  
605 embedded in the septa (Fig. 4). This remedial septum formation has been seen  
606 before when PS formation is disturbed in IPC mutants [13,19,63,78] and MEN  
607 mutants [37,63,78]. Chs3 is the chitin synthase, together with glucan synthases and  
608 mannosyltransferases responsible for the SS formation and the construction of the  
609 remedial septum [26,27,73]. However, the *chs3* $\Delta$  mutant is still viable and capable of  
610 divide, suggesting that additional chitin synthases might be able to incorporate chitin  
611 in the absence of Chs3. This may explain why the remedial septum is still formed in  
612 the *cdc55* $\Delta$  *chs3* $\Delta$  double mutant.

613 In addition, Hof1 regulates the CSIII function inhibiting Chs3 activation through the  
614 interaction with Chs4 [79]. Hof1 removal from the division site also dissociates Chs4,  
615 allowing Chs3 activation. Therefore, the increased Hof1 residence time in the  
616 absence of Cdc55 might predict an inactive Chs3 at the division site, and  
617 consequently less extensive SS formation, in agreement with the results of our  
618 calcofluor staining in *cdc55* $\Delta$  mutant cells.

619

620 Hof1 have been also involved in the regulation of septin organization [7,67].  
621 Therefore, the defects in Hof1 localization could be a consequence or a cause of  
622 defective septin function in *cdc55* $\Delta$  cells. Nevertheless, the preliminary results  
623 obtained from *in situ* immunofluorescence showed no alterations in septin structures  
624 in *cdc55* $\Delta$  cells. We did not detect any differences in protein levels or

625 phosphorylation states in Cdc11 and Shs1 in the absence of Cdc55. In addition, the  
626 dephosphorylation of septins by PP2A<sup>Rts1</sup> is known to be required for septin stability  
627 [76], suggesting that septins are regulated by the other PP2A regulatory subunit,  
628 Rts1.

629

630 Recently, it has been showed that multiple phosphatases shape the phospho-  
631 proteome during mitotic exit [45,46,80]. Notably, Hof1 and Chs2 phosphosites have  
632 been identified in *cdc55* and *cdc14* mutants [45]. Here, we demonstrated that Hof1  
633 and Chs2 are PP2A<sup>Cdc55</sup> substrates and Cdc14 was reported to dephosphorylate  
634 Chs2 [39]; supporting a possible redundant contribution to cytokinesis of several  
635 phosphatases. Further investigations will be required to understand the coordinate  
636 regulation of the multiple phosphatases during the cell cycle.

637

638 As most cytokinesis events and proteins are conserved in higher eukaryotes, it is  
639 reasonable to suppose that our results could be translated to the mechanism  
640 regulating cytokinesis in human cells. The PP2A<sup>Cdc55</sup> homologue in humans,  
641 PP2A<sup>B55</sup>, could regulate the proteins involved in the cleavage furrow and cell  
642 membrane integrity, which would help us understand the human diseases that  
643 feature altered cytokinesis.

644

## 645 **Materials and methods**

### 646 **Yeast strains, plasmids and cell-cycle synchronization procedures**

647 All yeast strains used in this study were derivatives of W303 and are listed in Table  
648 S1. Epitope tagging of endogenous genes and gene deletions were performed by  
649 gene targeting using polymerase chain reaction (PCR) products [81]. Cell

650 synchronization using  $\alpha$ -factor and metaphase arrest by Cdc20 depletion and entry  
651 into synchronous anaphase by Cdc20 re-introduction were performed as previously  
652 described [82]. To obtain the *pGAL1-CDC55* construct, the DNA fragment containing  
653 the *GAL1* promoter was cut with *SpeI* and subcloned into the *CDC55* containing  
654 plasmid previously digested with *NheI*.

655 All the *cdc55* $\Delta$  mutant strains were freshly prepared by transformation or by crossing  
656 strains to avoid accumulation of suppressor mutations. The introduction of the  
657 *cdc55* $\Delta$  deletion was determined by PCR-genotyping and observation of the slow  
658 growth and elongated morphology under the microscope.

659

#### 660 **Recombinant protein purification**

661 All plasmids were freshly introduced into BL21 *E. coli*. Cells were grown in LB  
662 medium and protein expression was induced with 0.1 mM isopropyl  $\beta$ -D-1-  
663 thiogalactopyranoside (IPTG) at 25°C overnight. Collected cells were washed with  
664 PBS1 and frozen for at least 30 minutes.

665 Cells containing His<sub>6</sub>-Cyc3, His<sub>6</sub>-Inn1 or His<sub>6</sub>-Hof1 plasmids[16] were resuspended in  
666 cold lysis buffer (30 mM Tris-HCl, pH 8, 300 mM NaCl, 30 mM imidazole, 0.1%  
667 NP40, 10 mM  $\beta$ -mercaptoethanol, 1 mM PMSF, complete EDTA-free tablet (Roche))  
668 and sonicated for 6 cycles of 1 min at 25  $\mu$ m amplitude. Protein extracts were  
669 clarified and incubated with Ni-NTA magnetic beads (Thermo Fisher) at 4°C for 1  
670 hour. Beads were washed with 10 volumes of lysis buffer and protein eluted in PBS,  
671 5 mM EDTA, 5 mM DTT, 0.1% NP40, 500 mM imidazole at 4°C for 30-60 minutes.

672 Cells containing StreptagIII-Chs2\_1-629 plasmid [16] were resuspended in cold lysis  
673 buffer (50 mM Tris-HCl, pH 8.0, 10% glycerol, 0.1% NP-40, 10 mM MgCl<sub>2</sub>, 300 mM  
674 NaCl, 5 mM  $\beta$ -mercaptoethanol, 10% BugBuster® (Millipore), 1 mM PMSF, complete

675 EDTA-free tablet (Roche) containing 5 U/mL of nuclease (Pierce), incubated in a  
676 rotatory wheel at 25°C for 20 minutes. Protein extracts were clarified and incubated  
677 with Strep-tactin® Superflow® resin (Iba Lifescience) at 4°C for 1 hour. Beads were  
678 washed with ten volumes of lysis buffer (without BugBuster®), and protein was  
679 eluted in 50 mM Tris-HCl, pH 8.0, 10% glycerol, 0.1% NP-40, 10 mM MgCl<sub>2</sub>, 150 mM  
680 NaCl, 5 mM β-mercaptoethanol, 2.5 mM desthiobiotin at 4°C for 1 hour.

681

### 682 **Co-immunoprecipitation, kinase assays and phosphatase assays**

683 Co-immunoprecipitation assays were performed using 10<sup>8</sup> yeast cells, which were  
684 resuspended in lysis buffer (50 mM HEPES-KOH, pH 7.5; 70 mM KOAc, 5 mM  
685 Mg(OAc)<sub>2</sub>; 10% glycerol; 0.1% Triton X-100; 8 μg/mL of protease inhibitors  
686 (leupeptin, pepstatin, aprotinin), 1 mM PMSF, 1.25 mg/ml of benzamidin, 1 tablet of  
687 complete protease inhibitor without EDTA (Roche); 4 mM of phosphatase inhibitors  
688 (β-glycerophosphate, NaF and NEM) and 1 tablet of PhosStop (Roche). Lysates  
689 obtained by mechanical lysis using glass beads in a Bertin disrupter (6 cycles of 10 s  
690 at 5,000 rpm). Protein extracts were clarified by centrifugation and incubated with α-  
691 Pk clone SV5-Pk1 (Serotec) and α-HA clone 12CA5 (Roche) antibodies for 1 hour.  
692 Protein extracts were then incubated for 1 hour with protein A-conjugated  
693 Dynabeads (Life Technologies), after which the beads were washed with lysis buffer  
694 at incremental KOAc concentrations (100 mM, 120 mM, 150 mM, and 60 mM  
695 NaOAc). Co-immunoprecipitated proteins were eluted with loading buffer and protein  
696 co-purification was visualized by western blot.

697 For kinase assays, immunoprecipitations were performed as above and incubated  
698 with α-Pk clone SV5-Pk1 (Serotec) antibody. Beads were washed with ten volumes  
699 of lysis buffer and twice with the kinase reaction buffer (50 mM Tris-HCl, pH7.4, 10

700 mM MgCl<sub>2</sub>, 1 mM DTT). The kinase reaction (50 mM Tris-HCl, pH7.4, 10 mM MgCl<sub>2</sub>,  
701 1 mM DTT, 5 mM β-glycerophosphate, 25 μM ATP, 10 mCi/mL <sup>32</sup>gamma-ATP and 2  
702 ng-1 μg of protein substrate (plus 2 mM EGTA for the Cdc5 kinase assay) was  
703 incubated at 30°C for 30 minutes for 6His-Inn1, 6His-Hof1, and Streptag-Chs2, and 1  
704 hour for 6Hys-Cyk3. Kinase assays were stopped by placing the tubes on ice. The  
705 supernatant containing the phosphorylated substrate was separated from the  
706 magnetic beads and stored at -80°C. An aliquot of the kinase assay was mixed with  
707 SDS-PAGE loading buffer, proteins were separated by electrophoresis, transferred  
708 to nitrocellulose membranes and radioactivity detected in a Typhoon FLA950 (GE  
709 Healthcare). Immunopurified protein was quantified by western blot and the  
710 membrane was stained with Coomassie to detect the recombinant substrate.  
711 Proteins were quantified using Fiji software [83].  
712 For phosphatase assays, cells containing HA<sub>3</sub>-Cdc55-ED and Cdc55 were collected  
713 after arresting them in metaphase. Immunoprecipitation was performed as above,  
714 but without phosphatase inhibitors, after which, beads were washed twice with  
715 phosphatase buffer. Beads were incubated with phosphatase reaction buffer (500  
716 mM Tris-HCl pH7.4, 1 mM EGTA, 10 mM β-mercaptoethanol, 10 mg/mL BSA; and  
717 the indicated phosphorylated substrate) at 30°C for 30 minutes. Reactions were  
718 terminated by adding SDS-PAGE loading buffer. Proteins were separated by  
719 electrophoresis, transferred to nitrocellulose membranes and radioactivity was  
720 detected in a Typhoon FLA950 apparatus (GE Healthcare). Western blot with the  
721 membrane was then performed to analyze and quantify the amount of protein  
722 immunoprecipitated. The membrane was stained with Coomassie to detect the  
723 recombinant substrate. Proteins were quantified using Fiji software, and values of  
724 the mean and SEM calculated.

725 For the Chs2 alkaline phosphatase assay, metaphase arrested cells were collected  
726 and native protein extracts were prepared following the immunoprecipitation  
727 protocol. The protein extracts were incubated with alkaline phosphatase (Anthartic  
728 phosphatase, New England Biolabs) in EBX reaction buffer (50mM HEPES/KOH pH  
729 7.5, 100mM KCl, 2.5mM MgCl<sub>2</sub>, 0.25% Triton X-100, 1M DTT) with protease  
730 inhibitors (8 µg/mL (leupeptin, pepstatin, aprotinin), 1 mM PMSF, 1.25 mg/ml of  
731 benzamidin, 1 tablet of complete protease inhibitor without EDTA (Roche)) at 37°C  
732 for 15 minutes. To inhibit the alkaline phosphatase PhosStop (Roche) was used.

733

### 734 **Microscopy techniques**

735 Synchronized cells for time-lapse experiments were deposited in chambers (Nunc  
736 Lab-Tek) containing concanavalin A/PBS 1 mg/mL. Images were captured every 2  
737 minutes. Different z-stacks at 0.7-µm intervals were taken and projected onto a  
738 single image per channel. A Zeiss-Apotome epifluorescence microscope with an  
739 HXP 120C fluorescent lamp and a Carl Zeiss Plan-Apochromat 63x N.A 1.40 oil  
740 immersion lens were used. The filters used were Cy3, GFP, and DAPI. For the GFP-  
741 Ras2 experiments the Apotome was disabled. For the Cyk3-GFP time-lapse  
742 experiments, a Carl Zeiss LSM880 confocal microscope, with a 63x N.A. objective  
743 was used. Images were acquired using ZEN software. Images were quantified and  
744 processed using FiJi software. To determine the symmetry of the IPC proteins, the  
745 bud neck length was measured, the central point calculated and manually  
746 established whether the central point was inside (symmetry) or outside (asymmetry)  
747 the dot signal.

748 Calcofluor staining was performed with calcofluor white MR2 (Fluorescent brightener  
749 28, Sigma) in living cells. Synchronized cells were incubated with 50 µg/mL

750 calcofluor upon release from the metaphase arrest. Images were acquired,  
751 quantified and processed as for the time-lapse experiments.  
752  
753 Phalloidin staining was performed on fixed cells. Cells collected during the time-  
754 course experiments were pre-fixed with PBS containing 3.7% formaldehyde and  
755 0.1% Triton X-100 at 25°C for 10 minutes. Cells were then washed with PBS1 and  
756 fixed with 3.7% formaldehyde at 25°C for 1 hour. After fixation, cells were washed  
757 twice with PBS1 and sedimented onto a multi-well slide previously incubated with  
758 poly-L-lysine. Cells were stained with a PBS solution containing 50 U/mL rhodamine  
759 phalloidin R415 (Life Technologies) for 2 hours. Cells were washed twice with PBS1.  
760 Mounting medium containing DAPI (Vectashield) was added, cells were covered with  
761 a coverslip and sealed with nail polish. Images were acquired, quantified and  
762 processed as for the time-lapse experiments.  
763  
764 For electron microscopy, cell samples were fixed with 0.2 M phosphate buffer  
765 (without salts) pH 7.4, containing 2.5% glutaraldehyde at 25°C, for 1 hour. Cells were  
766 washed three times with phosphate buffer without glutaraldehyde and rinsed with  
767 milliQ water and post-fixed with 1% osmium tetroxide for 2 hours. They were then  
768 dehydrated in an acetone series (10%, 20%, 30%, 40%, 60%, 80%, and 100%) for  
769 15-20 minutes. Ultrathin sections of 60-nm thickness were obtained using a UC6  
770 ultramicrotome (Leica Microsystems, Austria) and stained with 2% uranyl acetate  
771 and lead citrate. Sections were observed in a Jeol EM J1010 apparatus (Jeol,  
772 Japan) and images were acquired at 80 kV with a 1k CCD Megaview camera.  
773  
774 **Fluorescence flow cytometry analysis (FACS)**

775 The DNA content of cells was measured by FACS. Cells were fixed in absolute  
776 ethanol for 5 min, centrifuged for 5 min at maximum speed and resuspended in 50  
777 mM sodium citrate pH 7.4, containing 0.2 mg/ml RNase. Cells were incubated at  
778 50°C for 1 hour, before adding 1 mg/ml proteinase K, and incubating for an  
779 additional 1 hour. The same volume of 50 mM sodium citrate pH 7.4 containing 16  
780 µg/mL propidium iodide was added. DNA content was analyzed with a flow  
781 cytometer (Gallios Beckman Coulter) running Kaluza flow cytometry software.

782

### 783 **Other techniques**

784 Protein extracts for western blots were obtained by TCA protein extraction. For the  
785 phostag gels, 10 µM Phostag (Wako) 5-8% gels containing 10 mM MnCl<sub>2</sub> were  
786 used. Protein gels were washed with 1 mM EDTA before transferring protein to  
787 remove the manganese. Antibodies used for western blots were α-HA clone 12CA5  
788 (Roche), α-myc 9E10 (Babco), α-FLAG clone M2 (Sigma), α-Pk clone SV5-Pk1  
789 (Serotec), α-Clb2 (y-180) sc-907 (Santa Cruz Biotechnology), α-tubulin clone  
790 YOL1/34 (Serotec), α-phosphoglycerate kinase (Life Technologies), α-HA rabbit  
791 (Sigma), α-Pgk1 (Invitrogen), and α-Chs2[16]. The secondary antibodies were: α-  
792 Mouse-HRP (GE Healthcare), α-Rabbit-HRP (GE Healthcare), and α-Goat-HRP (GE  
793 Healthcare). Antibodies used for immunofluorescence were: α-HA clone 12CA5  
794 (Roche), α-Cdc14 (yE-17) sc-12045 (Santa Cruz Biotechnology), α-tubulin clone  
795 YOL1/34 (Serotec), and α-Cdc11 (Santa Cruz Biotechnology). The secondary  
796 antibodies were Cy3-labeled α-mouse (GE Healthcare), fluorescein-conjugated α-rat  
797 (Millipore), Cy3-labeled α-goat (GE Healthcare), red TEXAS α-rabbit (Jackson  
798 Laboratories) and 488 α-mouse (Life Technologies). Proteins were quantified using  
799 FiJi software, and values of the mean and SEM calculated.



800

## 801 **Statistical analysis**

802 All experiments were done at least three times. Statistical analyses were performed  
803 with Prism5. Student's T-test was used to analyze the p-values of the different  
804 assays compared. A p-value <0.05 was considered statistically significant,  
805  $p < 0.0001$  \*\*\*\*,  $p < 0.001$  \*\*\*,  $p < 0.01$  \*\*;  $p < 0.05$  \*.

806

807

## 808 **Acknowledgements**

809 We thank the optical and electron microscopy units of IDIBELL, the proteomic  
810 services of IDIBELL and the CCiT-UB for their support. The *cdc55-aid* mutant strain  
811 was a kind gift of Adam Rudner and the *CHS2-YFP* containing plasmids were a kind  
812 gift of Foong May Yeong. We thank all the members of our laboratory for discussing  
813 the work and for their critical reading of the manuscript. We thank CERCA  
814 Program/Generalitat de Catalunya for institutional support. Our laboratory is funded  
815 by the Spanish Ministry of Economy, Industry and Competitiveness (MINECO),  
816 which is part of the State Agency, through projects BFU2013-43132-P and  
817 BFU2016-77975-R (co-funded by the European Regional Development Fund, ERDF,  
818 a way to build Europe). ASD was supported by the grant BFU2014-58081-P from the  
819 Spanish Ministerio de Economía y Competitividad (co-funded by the European  
820 Regional Development Fund) and a grant from the Consejería de Universidades,  
821 Investigación, Medio Ambiente y Política Social del Gobierno de Cantabria.

822

823

824

825 **Author contribution:** YMR, OVC, MF and EQ performed the experiments. YMR,  
826 ASD and EQ designed the experiments and interpreted the data. YMR and EQ wrote  
827 the manuscript. All authors read and discussed the manuscript.

828

829

### 830 **Conflict of interest**

831 The authors declare no competing interests.

832

833

### 834 **References**

- 835 1. Fujiwara T, Bandi M, Nitta M, Ivanova E V., Bronson RT, Pellman D.  
836 Cytokinesis failure generating tetraploids promotes tumorigenesis in p53-null  
837 cells. *Nature*. 2005;437: 1043–7. doi:10.1038/nature04217
- 838 2. Okada S, Leda M, Hanna J, Savage NS, Bi E, Goryachev AB. Daughter Cell  
839 Identity Emerges from the Interplay of Cdc42, Septins, and Exocytosis. *Dev*  
840 *Cell*. 2013;26: 148–61. doi:10.1016/j.devcel.2013.06.015
- 841 3. Schneider C, Grois J, Renz C, Gronemeyer T, Johnsson N. Septin rings act as  
842 a template for myosin higher-order structures and inhibit redundant polarity  
843 establishment. *J Cell Sci*. 2013;126: 3390–400. doi:10.1242/jcs.125302
- 844 4. Ong K, Wloka C, Okada S, Svitkina T, Bi E. Architecture and dynamic  
845 remodelling of the septin cytoskeleton during the cell cycle. *Nat Commun*.  
846 2014;5: 5698. doi:10.1038/ncomms6698
- 847 5. Lippincott J, Li R. Dual function of Cyk2, a cdc15/PSTPIP family protein, in  
848 regulating actomyosin ring dynamics and septin distribution. *J Cell Biol*.  
849 1998;143: 1947–1960. doi:10.1083/jcb.143.7.1947
- 850 6. Oh Y, Schreiter J, Nishihama R, Wloka C, Bi E. Targeting and functional  
851 mechanisms of the cytokinesis-related F-BAR protein Hof1 during the cell

- 852 cycle. *Mol Biol Cell*. 2013;24: 1305–20. doi:10.1091/mbc.E12-11-0804
- 853 7. Meitinger F, Palani S, Hub B, Pereira G. Dual function of the NDR-kinase Dbf2  
854 in the regulation of the F-BAR protein Hof1 during cytokinesis. *Mol Biol Cell*.  
855 2013; 1–44. doi:10.1091/mbc.E12-08-0608
- 856 8. Finnigan GC, Booth EA, Duvalyan A, Liao EN, Thorner J. The carboxy-  
857 terminal tails of septins Cdc11 and Shs1 recruit myosin-II binding factor Bni5 to  
858 the bud neck in *Saccharomyces cerevisiae*. *Genetics*. 2015;200: 843–62.  
859 doi:10.1534/genetics.115.176503
- 860 9. Shannon KB, Li R. The multiple roles of Cyk1p in the assembly and function of  
861 the actomyosin ring in budding yeast. *Mol Biol Cell*. 1999;10: 283–96.  
862 doi:10.1091/mbc.10.2.283
- 863 10. Fang X, Luo J, Nishihama R, Wloka C, Dravis C, Travaglia M, et al. Biphasic  
864 targeting and cleavage furrow ingression directed by the tail of a myosin II. *J*  
865 *Cell Biol*. 2010;191: 1333–50. doi:10.1083/jcb.201005134
- 866 11. Mendes Pinto I, Rubinstein B, Kucharavy A, Unruh JR, Li R. Actin  
867 Depolymerization Drives Actomyosin Ring Contraction during Budding Yeast  
868 Cytokinesis. *Dev Cell*. 2012;22: 1247–60. doi:10.1016/j.devcel.2012.04.015
- 869 12. Chew TG, Huang J, Palani S, Sommese R, Kamnev A, Hatano T, et al. Actin  
870 turnover maintains actin filament homeostasis during cytokinetic ring  
871 contraction. *J Cell Biol*. 2017;216: 2657–2667. doi:10.1083/jcb.201701104
- 872 13. Nishihama R, Schreiter JH, Onishi M, Vallen EA, Hanna J, Moravcevic K, et al.  
873 Role of Inn1 and its interactions with Hof1 and Cyk3 in promoting cleavage  
874 furrow and septum formation in *S. cerevisiae*. *J Cell Biol*. 2009;185: 995–1012.  
875 doi:10.1083/jcb.200903125
- 876 14. Jendretzki A, Ciklic I, Rodicio R, Schmitz HP, Heinisch JJ. Cyk3 acts in

- 877 actomyosin ring independent cytokinesis by recruiting Inn1 to the yeast bud  
878 neck. *Mol Genet Genomics*. 2009;282: 437–51. doi:10.1007/s00438-009-0476-  
879 0
- 880 15. Wloka C, Vallen EA, Thé L, Fang X, Oh Y, Bi E. Immobile myosin-II plays a  
881 scaffolding role during cytokinesis in budding yeast. *J Cell Biol*. 2013;200:  
882 271–86. doi:10.1083/jcb.201208030
- 883 16. Foltman M, Molist I, Arcones I, Sacristan C, Filali-Mouncef Y, Roncero C, et al.  
884 Ingression Progression Complexes Control Extracellular Matrix Remodelling  
885 during Cytokinesis in Budding Yeast. *PLoS Genet*. 2016;12: e1005864.  
886 doi:10.1371/journal.pgen.1005864
- 887 17. Foltman M, Filali-Mouncef Y, Crespo D, Sanchez-Diaz A. Cell polarity protein  
888 Spa2 coordinates Chs2 incorporation at the division site in budding yeast.  
889 *PLoS Genet*. 2018;14: e1007299. doi:10.1371/journal.pgen.1007299
- 890 18. Devrekanli A, Foltman M, Roncero C, Sanchez-Diaz A, Labib K. Inn1 and  
891 Cyk3 regulate chitin synthase during cytokinesis in budding yeasts. *J Cell Sci*.  
892 2012;125: 5453–66. doi:10.1242/jcs.109157
- 893 19. Wang M, Nishihama R, Onishi M, Pringle JR. Role of the Hof1–Cyk3  
894 interaction in cleavage-furrow ingression and primary-septum formation during  
895 yeast cytokinesis. *Mol Biol Cell*. 2018;29: 597–609. doi:10.1091/mbc.E17-04-  
896 0227
- 897 20. Sburlati A, Cabib E. Chitin synthetase 2, a presumptive participant in septum  
898 formation in *Saccharomyces cerevisiae*. *J Biol Chem*. 1986;261: 15147–52.
- 899 21. Shaw JA, Mol PC, Bowers B, Silverman SJ, Valdivieso MH, Duran A, et al.  
900 The function of chitin synthases 2 and 3 in the *Saccharomyces cerevisiae* cell  
901 cycle. *J Cell Biol*. 1991;114: 111–23. doi:10.1083/jcb.114.1.111

- 902 22. Wloka C, Bi E. Mechanisms of cytokinesis in budding yeast. *Cytoskeleton*.  
903 2012;69: 710–726. doi:10.1002/cm.21046
- 904 23. Schmidt M, Bowers B, Varma A, Roh DH, Cabib E. In budding yeast,  
905 contraction of the actomyosin ring and formation of the primary septum at  
906 cytokinesis depend on each other. *J Cell Sci*. 2002;115: 293–302.
- 907 24. VerPlank L, Li R. Cell cycle-regulated trafficking of Chs2 controls actomyosin  
908 ring stability during cytokinesis. *Mol Biol Cell*. 2005;16: 2529–43.  
909 doi:10.1091/mbc.E04-12-1090
- 910 25. Sanchez-Diaz A, Marchesi V, Murray S, Jones R, Pereira G, Edmondson R, et  
911 al. Inn1 couples contraction of the actomyosin ring to membrane ingression  
912 during cytokinesis in budding yeast. *Nat Cell Biol*. 2008;10: 395–406.  
913 doi:10.1038/ncb1701
- 914 26. Cabib E, Sburlati A, Bowers B, Silverman SJ. Chitin synthase 1, an auxiliary  
915 enzyme for chitin synthesis in *Saccharomyces cerevisiae*. *J Cell Biol*.  
916 1989;108: 1665–72. doi:10.1083/jcb.108.5.1665
- 917 27. Douglas CM, Foor F, Marrinan JA, Morin N, Nielsen JB, Dahl AM, et al. The  
918 *Saccharomyces cerevisiae* FKS1 (ETG1) gene encodes an integral membrane  
919 protein which is a subunit of 1,3- $\beta$ -D-glucan synthase. *Proc Natl Acad Sci U S*  
920 *A*. 1994;91: 12907–11. doi:10.1073/pnas.91.26.12907
- 921 28. Weiss EL. Mitotic exit and separation of mother and daughter cells. *Genetics*.  
922 2012;192: 1165–1202. doi:10.1534/genetics.112.145516
- 923 29. Queralt E, Uhlmann F. Cdk-counteracting phosphatases unlock mitotic exit.  
924 *Curr Opin Cell Biol*. 2008/10/11. 2008;20: 661–668. doi:S0955-  
925 0674(08)00161-0 [pii] 10.1016/j.ceb.2008.09.003
- 926 30. Baro B, Queralt E, Monje-Casas F. Regulation of mitotic exit in *saccharomyces*

- 927 cerevisiae. *Methods in Molecular Biology*. 2017. pp. 3–17. doi:10.1007/978-1-  
928 4939-6502-1\_1
- 929 31. Rock JM, Amon A. The FEAR network. *Curr Biol*. 2009;19: R1063-8.  
930 doi:10.1016/j.cub.2009.10.002
- 931 32. Hotz M, Barral Y. The Mitotic Exit Network: New turns on old pathways. *Trends*  
932 *in Cell Biology*. 2014. pp. 145–152. doi:10.1016/j.tcb.2013.09.010
- 933 33. Visintin R, Craig K, Hwang ES, Prinz S, Tyers M, Amon A. The Phosphatase  
934 Cdc14 Triggers Mitotic Exit by Reversal of Cdk-Dependent Phosphorylation.  
935 *Mol Cell*. 1998;2: 709–718. doi:10.1016/S1097-2765(00)80286-5
- 936 34. Jiménez J, Castelao BA, González-Novo A, Sánchez-Pérez M. The role of  
937 MEN (mitosis exit network) proteins in the cytokinesis of *Saccharomyces*  
938 *cerevisiae*. *Int Microbiol*. 2005;8: 33–42. doi:im2305005 [pii]
- 939 35. Meitinger F, Boehm ME, Hofmann A, Hub B, Zentgraf H, Lehmann WD, et al.  
940 Phosphorylation-dependent regulation of the F-BAR protein Hof1 during  
941 cytokinesis. *Genes Dev*. 2011/04/19. 2011;25: 875–888.  
942 doi:10.1101/gad.622411
- 943 36. Yoshida S, Kono K, Lowery DM, Bartolini S, Yaffe MB, Ohya Y, et al. Polo-like  
944 kinase Cdc5 controls the local activation of Rho1 to promote cytokinesis.  
945 *Science (80- )*. 2006;313: 108–111. doi:10.1126/science.1126747
- 946 37. Meitinger F, Petrova B, Lombardi IM, Bertazzi DT, Hub B, Zentgraf H, et al.  
947 Targeted localization of Inn1, Cyk3 and Chs2 by the mitotic-exit network  
948 regulates cytokinesis in budding yeast. *J Cell Sci*. 2010/05/06. 2010;123:  
949 1851–1861. doi:jcs.063891 [pii] 10.1242/jcs.063891
- 950 38. Teh EM, Chai CC, Yeong FM. Retention of Chs2p in the ER requires N-  
951 terminal CDK1-phosphorylation sites. *Cell Cycle*. 2009;8: 2964–74.

- 952 39. Chin CF, Bennett AM, Ma WK, Hall MC, Yeong FM. Dependence of Chs2 ER  
953 export on dephosphorylation by cytoplasmic Cdc14 ensures that septum  
954 formation follows mitosis. *Mol Biol Cell*. 2012;23: 45–58. doi:10.1091/mbc.E11-  
955 05-0434
- 956 40. Naylor SG, Morgan DO. Cdk1-dependent phosphorylation of iqq1 governs  
957 actomyosin ring assembly prior to cytokinesis. *J Cell Sci*. 2014;127: 1128–37.  
958 doi:10.1242/jcs.144097
- 959 41. Palani S, Meitinger F, Boehm ME, Lehmann WD, Pereira G. Cdc14-dependent  
960 dephosphorylation of Inn1 contributes to Inn1-Cyk3 complex formation. *J Cell*  
961 *Sci*. 2012/03/29. 2012;125: 3091–3096. doi:10.1242/jcs.106021
- 962 42. Kuilman T, Maiolica A, Godfrey M, Scheidel N, Aebersold R, Uhlmann F.  
963 Identification of Cdk targets that control cytokinesis. *EMBO J*. 2015;34: 81–96.  
964 doi:10.15252/emj.201488958
- 965 43. Miller DP, Hall H, Chaparian R, Mara M, Mueller A, Hall MC, et al.  
966 Dephosphorylation of Iqq1 by Cdc14 regulates cytokinesis in budding yeast.  
967 *Mol Biol Cell*. 2015;26: 2913–26. doi:10.1091/mbc.E14-12-1637
- 968 44. Sanchez-Diaz A, Nkosi PJ, Murray S, Labib K, Sanchez-Diaz A, Nkosi PJ, et  
969 al. The Mitotic Exit Network and Cdc14 phosphatase initiate cytokinesis by  
970 counteracting CDK phosphorylations and blocking polarised growth. *EMBO J*.  
971 2012;31: 3620–3634. doi:10.1038/emboj.2012.224
- 972 45. Touati SA, Hofbauer L, Jones AW, Snijders AP, Kelly G, Uhlmann F. Cdc14  
973 and PP2A Phosphatases Cooperate to Shape Phosphoproteome Dynamics  
974 during Mitotic Exit. *Cell Rep*. 2019;29: 2015–2119.  
975 doi:10.1016/j.celrep.2019.10.041
- 976 46. Touati SA, Kataria M, Jones AW, Snijders AP, Uhlmann F. Phosphoproteome

- 977 dynamics during mitotic exit in budding yeast. *EMBO J.* 2018;37: e98745.  
978 doi:10.15252/emboj.201798745
- 979 47. Healy AM, Zolnierowicz S, Stapleton AE, Goebel M, DePaoli-Roach AA, Pringle  
980 JR. CDC55, a *Saccharomyces cerevisiae* gene involved in cellular  
981 morphogenesis: identification, characterization, and homology to the B subunit  
982 of mammalian type 2A protein phosphatase. *Mol Cell Biol.* 1991;11: 5767–  
983 5780. doi:10.1128/mcb.11.11.5767
- 984 48. Shu Y, Yang H, Hallberg E, Hallberg R. Molecular genetic analysis of Rts1p, a  
985 B' regulatory subunit of *Saccharomyces cerevisiae* protein phosphatase 2A.  
986 *Mol Cell Biol.* 1997;17: 3242–3253. doi:10.1128/mcb.17.6.3242
- 987 49. Jiang Y, Broach JR. Tor proteins and protein phosphatase 2A reciprocally  
988 regulate Tap42 in controlling cell growth in yeast. *EMBO J.* 1999;18: 2782–92.  
989 doi:10.1093/emboj/18.10.2782
- 990 50. Jonasson EM, Rossio V, Hatakeyama R, Abe M, Ohya Y, Yoshida S.  
991 Zds1/Zds2–PP2A(Cdc55) complex specifies signaling output from Rho1  
992 GTPase. *J Cell Biol.* 2016;212: 51–61. doi:10.1083/jcb.201508119
- 993 51. Yaakov G, Thorn K, Morgan DO. Separase Biosensor Reveals that Cohesin  
994 Cleavage Timing Depends on Phosphatase PP2ACdc55 Regulation. *Dev Cell.*  
995 2012;23: 124–136. doi:10.1016/j.devcel.2012.06.007
- 996 52. Pal G, Paraz MT, Kellogg DR. Regulation of Mih1/Cdc25 by protein  
997 phosphatase 2A and casein kinase 1. *J Cell Biol.* 2008/03/05. 2008;180: 931–  
998 945. doi:jcb.200711014 [pii] 10.1083/jcb.200711014
- 999 53. Juanes MA, Khoueiry R, Kupka T, Castro A, Mudrak I, Ogris E, et al. Budding  
1000 Yeast Greatwall and Endosulfines Control Activity and Spatial Regulation of  
1001 PP2ACdc55 for Timely Mitotic Progression. *PLoS Genet.* 2013;9: e1003575.



- 1002 doi:10.1371/journal.pgen.1003575
- 1003 54. Vernieri C, Chirolì E, Francia V, Gross F, Ciliberto A. Adaptation to the spindle  
1004 checkpoint is regulated by the interplay between Cdc28/Clbs and PP2A<sup>Cdc55</sup>.  
1005 J Cell Biol. 2013;202: 765–778. doi:10.1083/jcb.201303033
- 1006 55. Queralt E, Uhlmann F. Separase cooperates with Zds1 and Zds2 to activate  
1007 Cdc14 phosphatase in early anaphase. J Cell Biol. 2008;182: 873–883.  
1008 doi:10.1083/jcb.200801054
- 1009 56. Queralt E, Lehane C, Novak B, Uhlmann F. Downregulation of PP2A<sup>Cdc55</sup>  
1010 Phosphatase by Separase Initiates Mitotic Exit in Budding Yeast. Cell.  
1011 2006;125: 719–732. doi:10.1016/j.cell.2006.03.038
- 1012 57. Baro B, Rodríguez-Rodríguez J-A, Calabria I, Hernández ML, Gil C, Queralt E.  
1013 Dual Regulation of the Mitotic Exit Network (MEN) by PP2A-Cdc55  
1014 Phosphatase. PLoS Genet. 2013;9: e1003966.  
1015 doi:10.1371/journal.pgen.1003966
- 1016 58. Baro B, Játiva S, Calabria I, Vinaixa J, Bech-Serra JJ, De La Torre C, et al.  
1017 SILAC-based phosphoproteomics reveals new PP2A-Cdc55-regulated  
1018 processes in budding yeast. Gigascience. 2018;7: giy407.  
1019 doi:10.1093/gigascience/giy047
- 1020 59. Korinek WS, Bi E, Epp JA, Wang L, Ho J, Chant J. Cyk3, a novel SH3-domain  
1021 protein, affects cytokinesis in yeast. Curr Biol. 2000;10: 947–50.  
1022 doi:10.1016/S0960-9822(00)00626-6
- 1023 60. Nishimura K, Fukagawa T, Takisawa H, Kakimoto T, Kanemaki M. An auxin-  
1024 based degron system for the rapid depletion of proteins in nonplant cells. Nat  
1025 Methods. 2009;6: 917–22. doi:10.1038/nmeth.1401
- 1026 61. Vallen EA, Caviston J, Bi E. Roles of Hof1p, Bni1p, Bnr1p, and Myo1p in

- 1027 cytokinesis in *Saccharomyces cerevisiae*. *Mol Biol Cell*. 2000;11: 593–611.  
1028 doi:10.1091/mbc.11.2.593
- 1029 62. Jakobsen MK, Cheng Z, Lam SK, Roth-Johnson E, Barfield RM, Schekman R.  
1030 Phosphorylation of Chs2p regulates interaction with COPII. *J Cell Sci*.  
1031 2013;126: 2151–6. doi:10.1242/jcs.115915
- 1032 63. Oh Y, Chang KJ, Orlean P, Wloka C, Deshaies R, Bi E. Mitotic exit kinase  
1033 Dbf2 directly phosphorylates chitin synthase Chs2 to regulate cytokinesis in  
1034 budding yeast. *Mol Biol Cell*. 2012/05/11. 2012;23: 2445–2456. doi:mbc.E12-  
1035 01-0033 [pii] 10.1091/mbc.E12-01-0033
- 1036 64. Játiva S, Calabria I, Moyano-Rodriguez Y, Garcia P, Queralt E. Cdc14  
1037 activation requires coordinated Cdk1-dependent phosphorylation of Net1 and  
1038 PP2A–Cdc55 at anaphase onset. *Cell Mol Life Sci*. 2019;76: 3601–3620.  
1039 doi:10.1007/s00018-019-03086-5
- 1040 65. Kim HB, Haarer BK, Pringle JR. Cellular morphogenesis in the  
1041 *Saccharomyces cerevisiae* cell cycle: localization of the CDC3 gene product  
1042 and the timing of events at the budding site. *J Cell Biol*. 1991;112: 535–544.  
1043 doi:10.1083/jcb.112.4.535
- 1044 66. Iwase M, Luo J, Nagaraj S, Longtine M, Kim HB, Haarer BK, et al. Role of a  
1045 Cdc42p effector pathway in recruitment of the yeast septins to the presumptive  
1046 bud site. *Mol Biol Cell*. 2006;17: 1110–25. doi:10.1091/mbc.E05-08-0793
- 1047 67. Lippincott J, Li R. Sequential assembly of myosin II, an IQGAP-like protein,  
1048 and filamentous actin to a ring structure involved in budding yeast cytokinesis.  
1049 *J Cell Biol*. 1998;140: 355–66. doi:10.1083/jcb.140.2.355
- 1050 68. McQuilken M, Jentsch MS, Verma A, Mehta SB, Oldenbourg R, Gladfelter  
1051 AS. Analysis of septin reorganization at cytokinesis using polarized

- 1052 fluorescence microscopy. *Front Cell Dev Biol.* 2017;5: 42.  
1053 doi:10.3389/fcell.2017.00042
- 1054 69. Tamborrini D, Juanes MA, Ibanes S, Rancati G, Piatti S. Recruitment of the  
1055 mitotic exit network to yeast centrosomes couples septin displacement to  
1056 actomyosin constriction. *Nat Commun.* 2018;9: 4308. doi:10.1038/s41467-018-  
1057 06767-0
- 1058 70. Lew DJ, Reed SI. Morphogenesis in the yeast cell cycle: Regulation by Cdc28  
1059 and cyclins. *J Cell Biol.* 1993;120: 1305–1320. doi:10.1083/jcb.120.6.1305
- 1060 71. Kennedy EK, Dysart M, Lianga N, Williams EC, Pilon S, Doré C, et al.  
1061 Redundant regulation of Cdk1 tyrosine dephosphorylation in *Saccharomyces*  
1062 *cerevisiae*. *Genetics.* 2016;202: 903–10. doi:10.1534/genetics.115.182469
- 1063 72. Minshull J, Straight A, Rudner AD, Dernburg AF, Belmont A, Murray AW.  
1064 Protein phosphatase 2A regulates MPF activity and sister chromatid cohesion  
1065 in budding yeast. *Curr Biol.* 1996;6: 1609–1620. doi:10.1016/S0960-  
1066 9822(02)70784-7
- 1067 73. Cabib E, Schmidt M. Chitin synthase III activity, but not the chitin ring, is  
1068 required for remedial septa formation in budding yeast. *FEMS Microbiol Lett.*  
1069 2003;224: 299–305. doi:10.1016/S0378-1097(03)00477-4
- 1070 74. Holt LJ, Tuch BB, Villén J, Johnson AD, Gygi SP, Morgan DO, et al. Global  
1071 analysis of Cdk1 substrate phosphorylation sites provides insights into  
1072 evolution. *Science.* 2009;325: 1682–6. doi:10.1126/science.1172867
- 1073 75. Chin CF, Tan K, Onishi M, Chew YY, Augustine B, Lee WR, et al. Timely  
1074 Endocytosis of Cytokinetic Enzymes Prevents Premature Spindle Breakage  
1075 during Mitotic Exit. *PLoS Genet.* 2016;12: e1006195.  
1076 doi:10.1371/journal.pgen.1006195

- 1077 76. Dobbelaere J, Gentry MS, Hallberg RL, Barral Y. Phosphorylation-dependent  
1078 regulation of septin dynamics during the cell cycle. *Dev Cell*. 2003;4: 345–57.  
1079 doi:10.1016/S1534-5807(03)00061-3
- 1080 77. Gentry MS, Hallberg RL. Localization of *Saccharomyces cerevisiae* protein  
1081 phosphatase 2A subunits throughout mitotic cell cycle. *Mol Biol Cell*. 2002;13:  
1082 3477–3492. doi:10.1091/mbc.02-05-0065
- 1083 78. Park SY, Cable AE, Blair J, Stockstill KE, Shannnon KB. Bub2 regulation of  
1084 cytokinesis and septation in budding yeast. *BMC Cell Biol*. 2009;10: 43.  
1085 doi:10.1186/1471-2121-10-43
- 1086 79. Oh Y, Schreiter JH, Okada H, Wloka C, Okada S, Yan D, et al. Hof1 and Chs4  
1087 Interact via F-BAR Domain and Sel1-like Repeats to Control Extracellular  
1088 Matrix Deposition during Cytokinesis. *Curr Biol*. 2017;27: 2878–2886.  
1089 doi:10.1016/j.cub.2017.08.032
- 1090 80. Godfrey M, Touati SA, Kataria M, Jones A, Snijders AP, Uhlmann F.  
1091 PP2A(Cdc55) Phosphatase Imposes Ordered Cell-Cycle Phosphorylation by  
1092 Opposing Threonine Phosphorylation. *Mol Cell*. 2017;65: 393-402.e3.  
1093 doi:10.1016/j.molcel.2016.12.018
- 1094 81. Knop M, Siegers K, Pereira G, Zachariae W, Winsor B, Nasmyth K, et al.  
1095 Epitope tagging of yeast genes using a PCR-based strategy: More tags and  
1096 improved practical routines. *Yeast*. 1999;15: 963–972. doi:10.1002/(SICI)1097-  
1097 0061(199907)15:10B<963::AID-YEA399>3.0.CO;2-W
- 1098 82. Monje-Casas F, Queralt E. The Mitotic Exit Network. Fernando Monje-Casas  
1099 EQ, editor. Humana Press; 2017. doi:10.1007/978-1-4939-6502-1
- 1100 83. Schindelin J, Arganda-Carreras I, Frise E, Kaynig V, Longair M, Pietzsch T, et  
1101 al. Fiji: An open-source platform for biological-image analysis. *Nat Methods*.

1102 2012;9: 676–82. doi:10.1038/nmeth.2019

1103

1104

1105 **Figure legends**

1106 **Figure 1. PP2A<sup>Cdc55</sup> participates in the dephosphorylation of IPC proteins**

1107 **during anaphase and cytokinesis.** (a) The double mutants *cdc55 hof1* and *cdc55*

1108 *cyk3* are synthetic sick. Serial dilutions of W303, Y844, Y1728, Y1730, Y1747, and

1109 Y1749 were spotted in YPD plates, with and without 1.5 mM auxin (IAA). Cells were

1110 grown at 25°C for 2-3 days. (b-e) PP2A<sup>Cdc55</sup> regulates Hof1 and Inn1

1111 dephosphorylation. Strains Y1314, Y1394, Y1639, Y1640, Y1437, Y1438, Y1318

1112 and Y1315 were arrested in metaphase and released into anaphase by Cdc20

1113 depletion and re-addition. Proteins phosphorylations were analyzed by western blot

1114 in Phos-tag gels. Unspecific bands were detected for Chs2 and marked as (a). Pgc1

1115 levels were used as a loading control. Mitosis progression was followed by analyzing

1116 the anaphase spindle elongation by *in situ* immunofluorescence. At least 100 cells

1117 were scored at each time-point. Quantification of the western blots was perform

1118 using Fiji Software and means and SEMs are represented. Student's unpaired t-test

1119 analyses were carried out using the Prism5 program. (f) PP2A<sup>Cdc55</sup> forms a complex

1120 with IPC proteins. Strains Y1565, Y1566, Y1423, and Y1567 were synchronized into

1121 anaphase progression by Cdc20 depletion and re-addition. Strains Y1437, Y1312,

1122 Y1314, and Y1318 without Pk-Cdc55 were used as negative controls. Protein

1123 extracts were prepared at metaphase, anaphase, and cytokinesis. Cdc55 was

1124 purified by immunoprecipitation with Pk antibody. Co-purification of Cyk3-HA<sub>6</sub>, Inn1-

1125 HA<sub>6</sub>, Hof1-HA<sub>6</sub>, and Chs2-HA<sub>6</sub> was analyzed by western blot.

1126

1127 **Figure 2. PP2A<sup>Cdc55</sup> dephosphorylates Hof1 and Chs2 *in vitro*.** Strains Y824,  
1128 Y1652 and Y1653 were arrested in metaphase by Cdc20 depletion. Cdc55 and  
1129 *cdc55-ED* were purified by immunoprecipitation with HA antibody. <sup>32</sup>P-Hof1 obtained  
1130 from the Clb2-Cdk1 kinase assays (a), and <sup>32</sup>P-Chs2 phosphorylated by Cdk1-Clb2  
1131 (b) or Dbf2-Mob1 (c) were used as substrate in the phosphatase assays.  
1132 Representative images of the phosphatase assays are shown. Quantification of the  
1133 remaining phosphorylation signals normalized with respect to the amount of  
1134 immunopurified HA-Cdc55 or HA-*cdc55-ED* are shown. Means and SEMs of three  
1135 phosphatase assays are represented. Student's paired t-test analysis was carried  
1136 out using the Prism5 program.

1137

1138 **Figure 3. PP2A<sup>Cdc55</sup> regulates AMR constriction and septum formation.** (a)  
1139 Absence of Cdc55 promotes the asymmetry of Myo1-tdTomato signal upon AMR  
1140 contraction. Strains Y1306 and Y1578 were arrested in metaphase and released into  
1141 anaphase by Cdc20 depletion and re-addition, and time-lapse images were captured  
1142 every 2 minutes. Spc42-GFP (spindle pole body protein) was used as the control for  
1143 anaphase progression. Maximum intensity z-projection images of Myo1-tdTomato  
1144 signal in *CDC55* and *cdc55Δ* are shown (left panel). Quantification of the contraction  
1145 time of Myo1-tdTomato (right panel). (b) Quantification of the population of cells with  
1146 asymmetric Myo1 constriction in *CDC55* (N=30) and *cdc55Δ* (N=30) from (a) is  
1147 shown. (c) PP2A<sup>Cdc55-ED</sup> inactive phosphatase promotes Myo1 asymmetry in a similar  
1148 way to the *cdc55Δ* deletion mutant. Strains Y1652, Y1653 and Y1788 were arrested  
1149 in metaphase and released into anaphase by Cdc20 depletion and re-addition.  
1150 *cdc55-aid* degradation was induced by the addition of 0.5 mM auxin for 3 hours  
1151 during the metaphase arrest and auxin was maintained after Cdc20 re-addition.

1152 Time-lapse images were captured every 2 minutes. Quantification of the cell  
1153 population with asymmetric Myo1 constriction in Cdc55 (N=9), *cdc55-aid* (N=35) and  
1154 *cdc55-ED* (N=17) is shown (left panel). Maximum intensity z-projection images of  
1155 Myo1-tdTomato signal from Cdc55, *cdc55-aid* and *cdc55-ED* cells (right panel).  
1156 Scale bar, 1  $\mu$ m. (d) Chitin deposition at primary and secondary septa is regulated by  
1157 PP2A<sup>Cdc55</sup>. Strains Y1516, Y1512, Y1605, and Y1596 were arrested in metaphase  
1158 by Cdc20 depletion, and released into anaphase by Cdc20 re-induction. 50  $\mu$ g  
1159 calcofluor was added to visualize both septa (left panel) and primary septum (right  
1160 panel). Scale bar, 2  $\mu$ m. Student's unpaired t-test was carried out using the Prism5  
1161 program

1162

1163 **Figure 4. Asymmetric primary septum formation and appearance of the**  
1164 **remedial septum in the absence of Cdc55.** Strains Y1315 (WT), Y1318 (*cdc55* $\Delta$ ),  
1165 Y1605 (*chs3* $\Delta$ ), and Y1596 (*cdc55* $\Delta$  *chs3* $\Delta$ ) were arrested in metaphase and  
1166 released into anaphase by Cdc20 depletion and re-addition. Representative images  
1167 from TEM are shown. Scale bar, 0.5  $\mu$ m. PS, SS and RS denotes primary septum,  
1168 secondary septa and remedial septum respectively.

1169

1170 **Figure 5. PP2A<sup>Cdc55</sup> is required for proper IPC localization and contraction at**  
1171 **the division site.** Strains Y1576, Y1575, Y1574, Y1604, Y1306, Y1578, Y1454,  
1172 Y1608, Y1572, and Y1606 were synchronized into anaphase by Cdc20 depletion  
1173 and re-addition, and time-lapse images were captured every 2 minutes. Spc42-GFP  
1174 and Myo1-tdTomato were used as a control for cytokinesis progression. (a)  
1175 Percentage of cells with IPC asymmetric signal is shown (left panel). Maximum  
1176 intensity z-projection images of Chs2-GFP, Cyk3-GFP, Hof1-GFP, Inn1-GFP and

1177 Iqg1-GFP signal in *CDC55* and *cdc55Δ* are shown (right panel). (b) Quantification of  
1178 the Iqg1-GFP and Hof1-GFP signal from the onset of contraction until the signal  
1179 disappearance relative to the Myo1 signal contraction. (c) Analysis of the time of  
1180 localization at the division site of Cyk3-GFP, Inn1-GFP, and Chs2-GFP. Student's  
1181 unpaired t-test was carried out using the Prism5 program.

1182

1183 **Figure 6. The non-phosphorylatable *chs2-6A* version rescues the asymmetric**

1184 **AMR contraction in the *cdc55Δ* mutant cells.** Strains Y1852 containing control

1185 *GAL1-CHS2* and Y1830 the non-phosphorylatable *GAL1-chs2-6A* mutant in a *cdc55Δ*

1186 mutant were arrested at metaphase by Cdc20 depletion. Galactose was added for 3

1187 hours before synchronous release into anaphase by Cdc20 re-introduction and time-

1188 lapse images were captured every 2 minutes to visualize Myo1-tdTomato and Chs2-

1189 YFP. (a) Percentage of cells with asymmetric Myo1 and Chs2 signal is represented.

1190 Representative images of Myo1 and Chs2 are shown. (b) Quantifications of the

1191 contraction time of Myo1-tdTomato and Chs2-YFP are depicted.

1192

1193 **Figure 7. Model for PP2A<sup>Cdc55</sup> regulation of actomyosin ring (AMR) contraction,**

1194 **primary septum (PS) and secondary septa (SS) formation.** Dephosphorylation of

1195 Hof1 and Chs2 by PP2A<sup>Cdc55</sup> coordinates AMR contraction and primary septum

1196 formation. Increased Hof1 residence time at the division site delays formation of

1197 secondary septa.

1198

1199

1200

1201 **Supplemental Figure legends**



1202

1203 **Figure S1. PP2A<sup>Cdc55</sup> regulates Iqg1 phosphorylation, but not Myo1.** (a) Strains  
1204 Y1491 and Y1497 were arrested in metaphase by Cdc20 depletion and released into  
1205 anaphase by Cdc20 re-addition. Myo1 and Iqg1 phosphorylation were analyzed by  
1206 western blot in Phos-tag gels. Myo1-Flag levels were used as the loading control.  
1207 Mitosis progression was followed by FACS analysis of DNA content and anaphase  
1208 spindle elongation by *in situ* immunofluorescence. At least 100 cells were scored at  
1209 each time point. Means and SEMs are represented (bottom). Student's unpaired t-  
1210 test analysis was carried out using the Prism5 software. (b) Alkaline phosphatase  
1211 assay for Chs2. Native protein extracts were prepared from Y1318 arrested in  
1212 metaphase. PhosStop was used as the alkaline phosphatase's inhibitor. Protein  
1213 phosphorylation was analyzed by western blot in Phos-tag gels.

1214

1215 **Figure S2. Inn1, Hof1, and Chs2 *in vitro* phosphorylation by mitotic kinases.**

1216 Strains Y824, Y688, Y2231, and Y1357 were arrested in metaphase by Cdc20  
1217 depletion. Strain Y1357 was released into anaphase by Cdc20 re-addition and  
1218 samples were collected at 30 min when cells were in anaphase. Protein kinases  
1219 were purified by immunoprecipitation with Pk antibody. <sup>6</sup>His-Inn1, <sup>6</sup>His-Hof1 and  
1220 Strep-tag-Chs2-1-629 purified from *E. coli* were used as substrates. (a) Inn1 was  
1221 phosphorylated by Clb2-Cdk1; (b) Hof1 was phosphorylated by Clb2-Cdk1; and (c)  
1222 Chs2 was phosphorylated by Clb2-Cdc28 and Dbf2. Representative western blots of  
1223 the kinase assays are shown. The quantity of kinases immunoprecipitated was  
1224 analyzed by western blot. Radioactive signals were detected using a multi-purpose  
1225 imaging plate (GE healthcare) in a Typhoon FLA950 apparatus. Protein levels were  
1226 quantified using Fiji software.

1227

1228 **Figure S3. Septin structures are not altered in the absence of Cdc55.** Cycling  
1229 cells from strains Y1588 and Y1589 were fixed and immunofluorescence *in situ*  
1230 performed for septins Cdc11 and Shs1-HA visualization.  $\alpha$ -Cdc11 and  $\alpha$ -HA clone  
1231 12CA5 antibodies were used. Representative images of Cdc11 and Shs1-HA septin  
1232 structures from *CDC55* and *cdc55* $\Delta$  cells are shown. Scale bar, 1  $\mu$ m.

1233

1234 **Figure S4. Actin is polarized to the new bud site before cytokinesis completion**  
1235 **in *cdc55* $\Delta$  cells.** Strains Y1434 (*CDC55*) and Y1435 (*cdc55* $\Delta$ ) were arrested in  
1236 metaphase by Cdc20 depletion and released into anaphase by Cdc20 re-induction.  
1237 Formaldehyde-fixed cells were stained with 50 U/mL of rhodamine phalloidin. (a)  
1238 Maximum intensity z-projection images of the actin staining and Myo1-GFP signals  
1239 from *CDC55* and *cdc55* $\Delta$  at different cell cycle stages (metaphase, anaphase,  
1240 cytokinesis and the next S phase are shown. (b) Quantification and representative  
1241 images of the cells with re-polarized actin at the new bud site are shown. Scale bar,  
1242 1  $\mu$ m.

1243

1244 **Figure S5. Myo1 asymmetric signal in *cdc55* $\Delta$  cells is not a consequence of its**  
1245 **tagging or the synchronization method used.** Strains Y1434 and Y1435 were  
1246 arrested in metaphase and released into anaphase by Cdc20 depletion and re-  
1247 addition. Strains Y1725 and Y1761 were arrested in G1 by  $\alpha$ -factor addition and  
1248 released into cell cycle progression by pheromone removal. Cells were fixed with  
1249 formaldehyde before taking images. Quantification of the cell population with  
1250 asymmetric Myo1 signal is shown (upper panel). Representative images of the

1251 Myo1-GFP signal from *CDC55* and *cdc55Δ* cells, and Myo1-tdTomato from *CDC55*  
1252 *cdc28-Y19F* cells are shown (lower panel). Scale bar, 1  $\mu$ m.

1253

1254 **Figure S6. Proper cytoplasm separation during membrane abscission in the**

1255 **absence of Cdc55.** Strains Y1717 and Y1708 were arrested in metaphase by

1256 Cdc20 depletion and released into anaphase by Cdc20 re-induction. Time-lapse

1257 images were captured every 2 minutes. Membrane abscission was followed by

1258 3GFP-Ras2 signal, and Myo1-tdTomato was used as a control for cytokinesis

1259 progression. Representative images from *CDC55* (N=12) and *cdc55Δ* (N=13) cells

1260 are shown. Images are taken from the best z-stack to visualize the division site.

1261 Scale bar, 1  $\mu$ m. Cumulative percentage of cells abscised is represented (lower

1262 panel).

1263

1264 **Figure S7. IPCs localization at the division site.** All strains were synchronized at

1265 the metaphase to anaphase transition by Cdc20 depletion and re-addition. Time-

1266 lapse images were captured every 2 minutes. Spc42-GFP and Myo1-tdTomato were

1267 used as a control for cytokinesis progression. Maximum intensity z-projection images

1268 of IPCs GFP-tagged proteins and Myo1-tdTomato contraction signals

1269 from *CDC55* and *cdc55Δ* cells are shown. (a) Iqg1 contraction at the bud neck is

1270 normal in the absence of Cdc55. Strains Y1572 and Y1606 were used. (b) Hof1

1271 contraction is longer in the absence of Cdc55. Strains Y1306 and Y1578 were used.

1272 (c) Cyk3-GFP residence time in the bud neck is longer in *cdc55Δ* cells. Strains

1273 Y1574 and Y1604 were used. (d) Inn1-GFP residence time in the bud neck is not

1274 dependent on the presence of Cdc55. Strains Y1454 and Y1608 were used. (e)

- 1275 Chs2-GFP residence time in the bud neck is affected by Cdc55. Strains Y1576 and  
1276 Y1575 were used. Scale bar, 1  $\mu\text{m}$ .

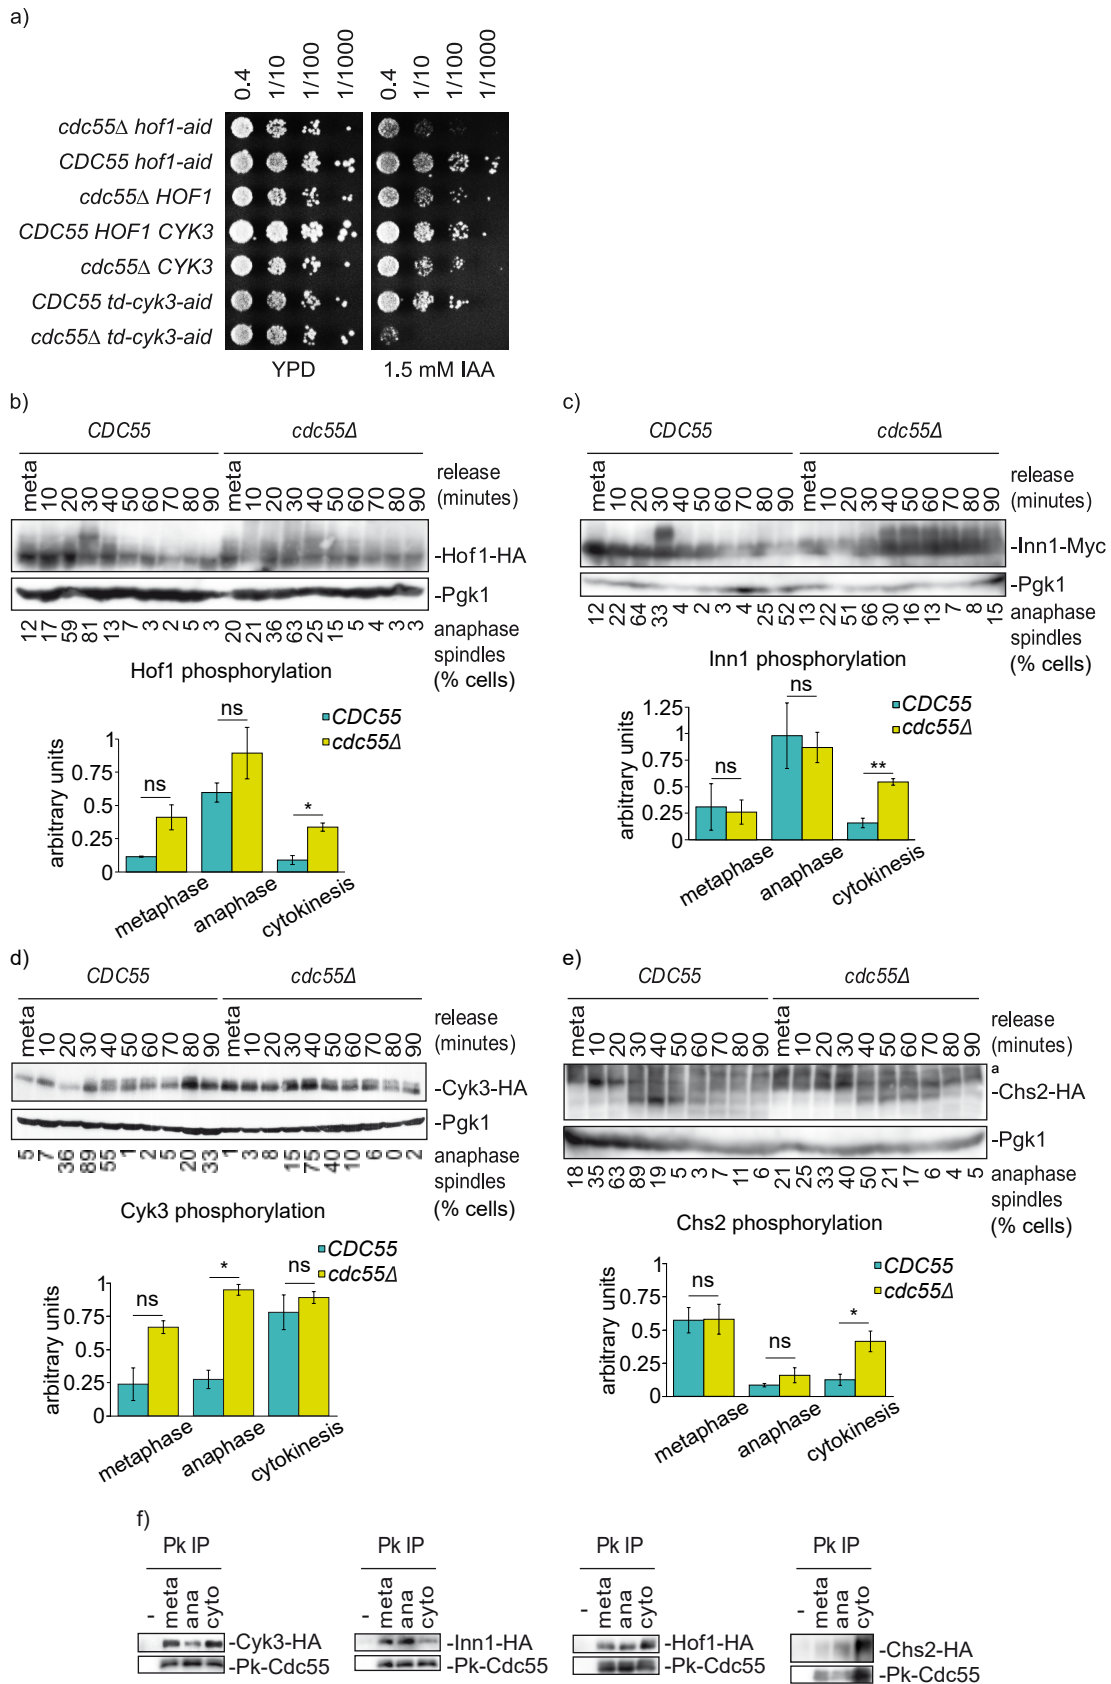

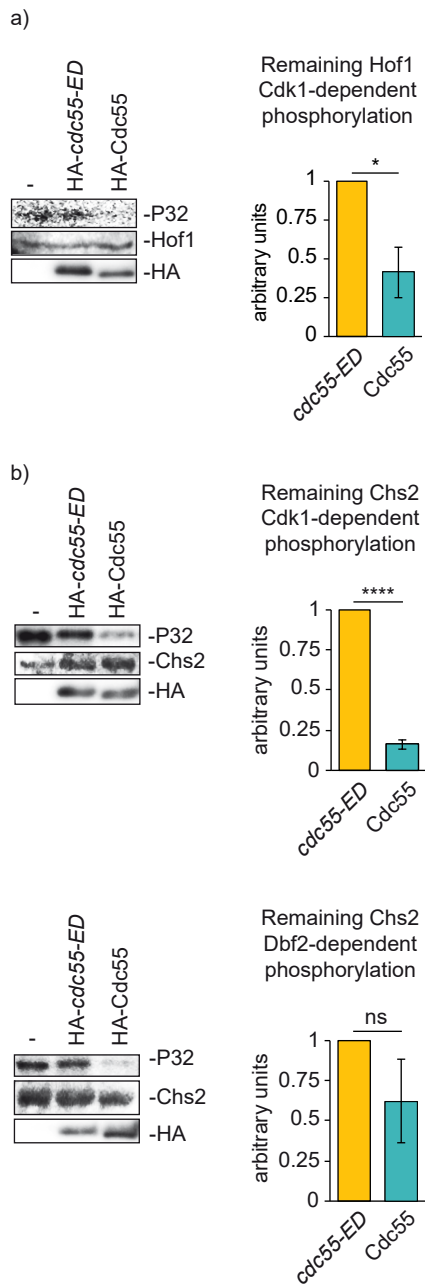

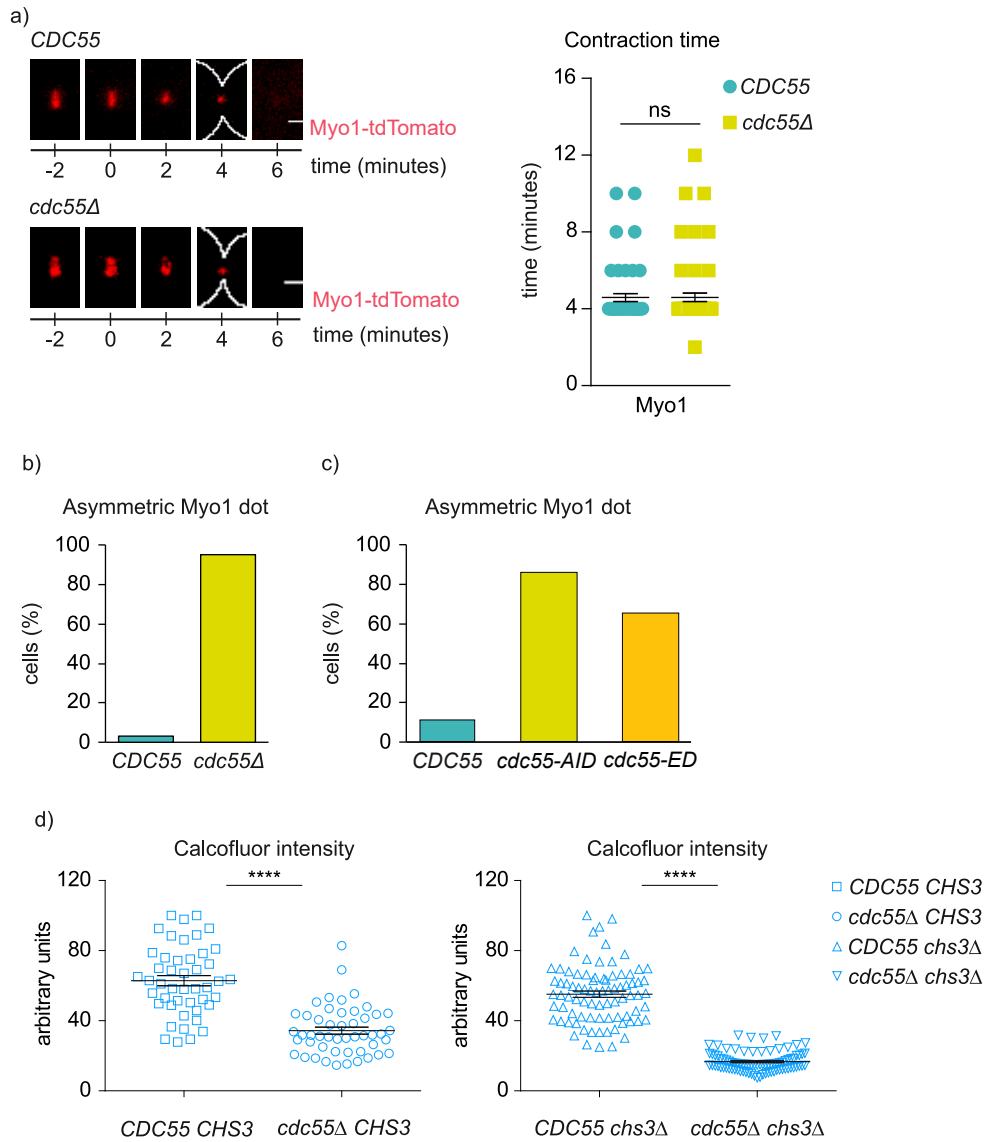

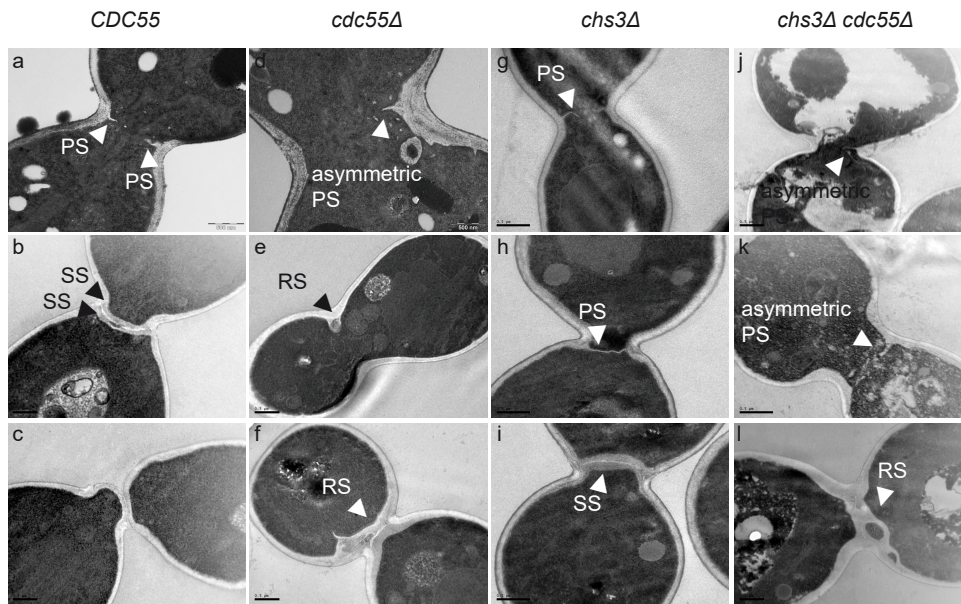



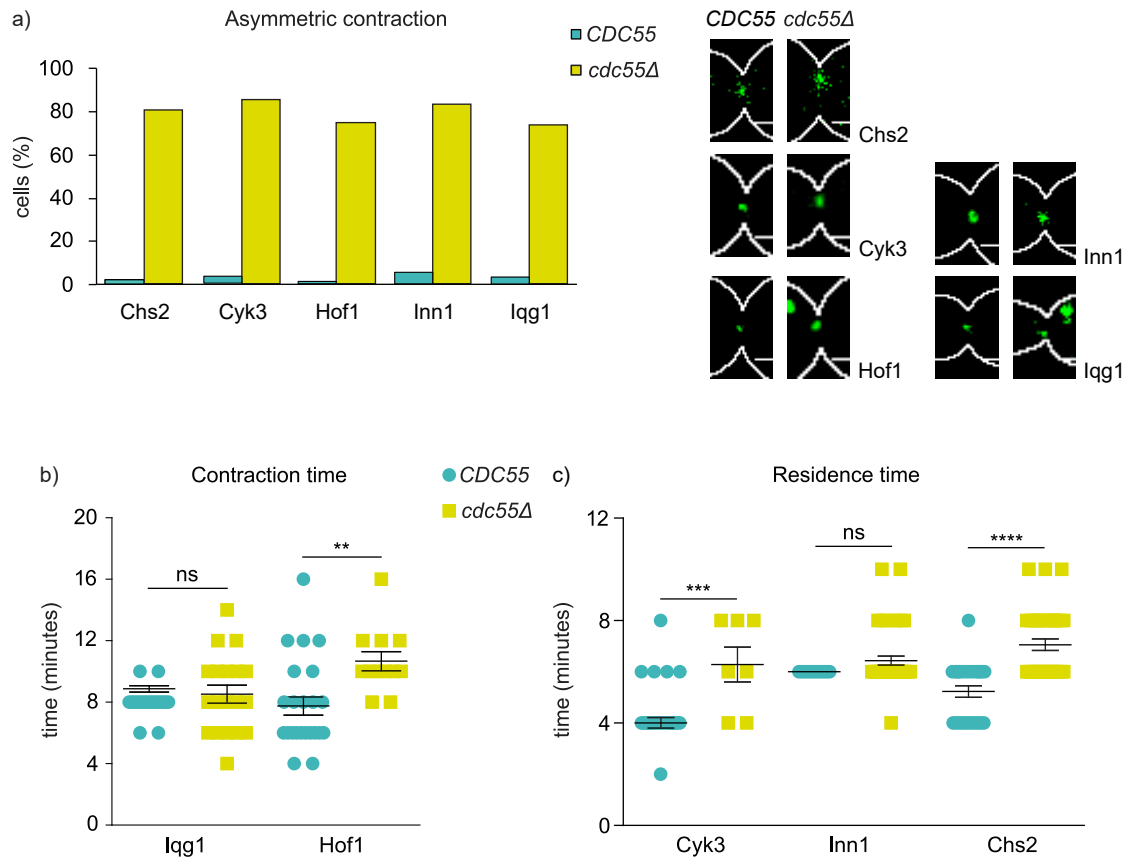

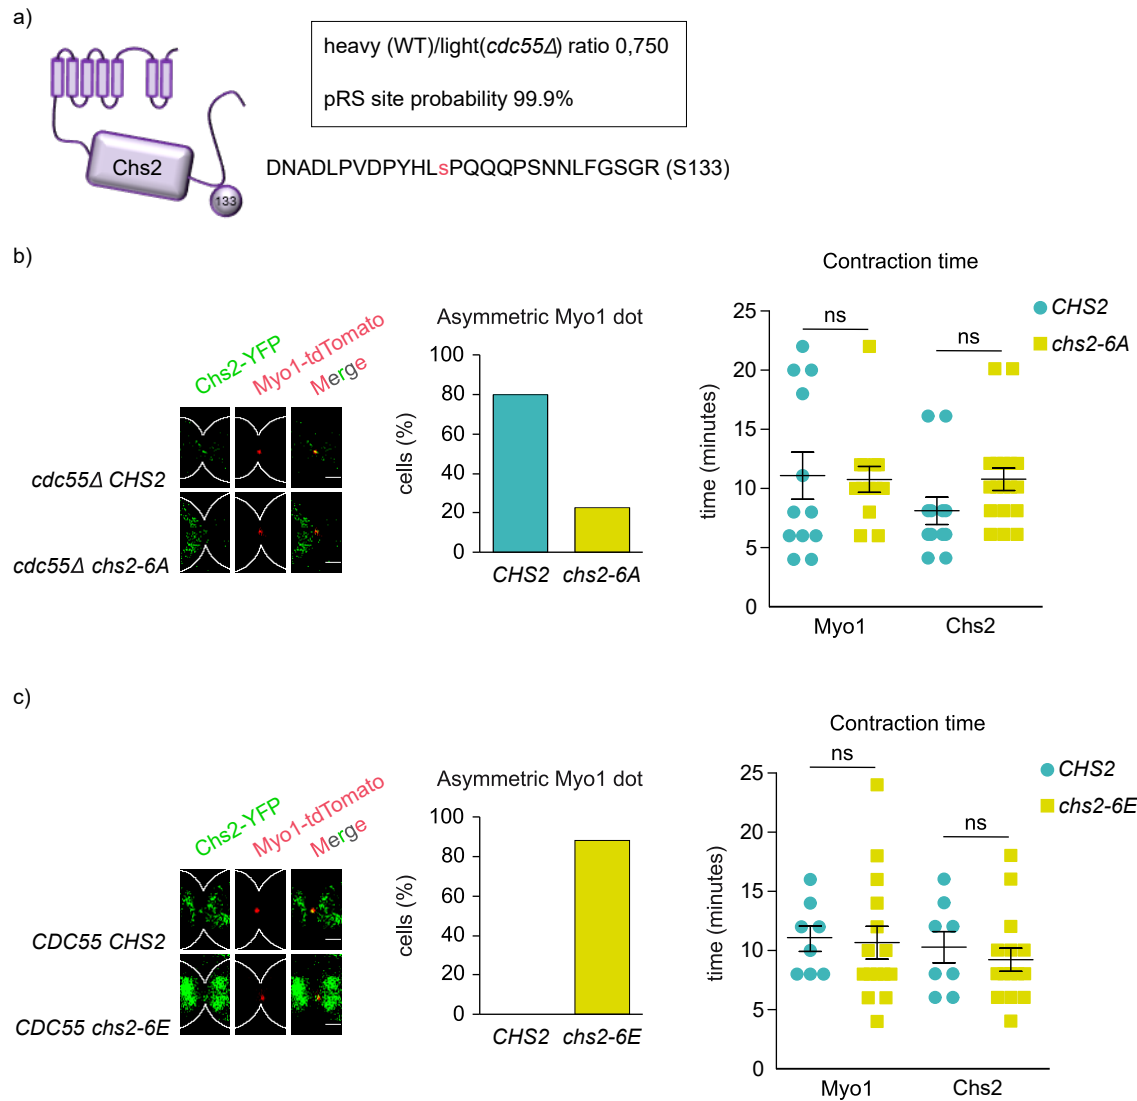

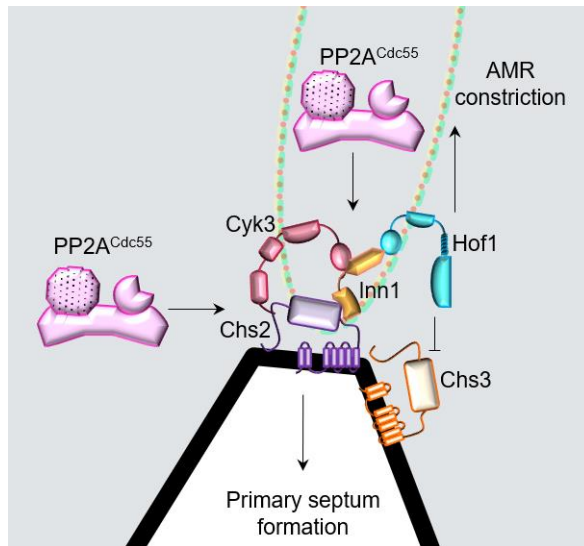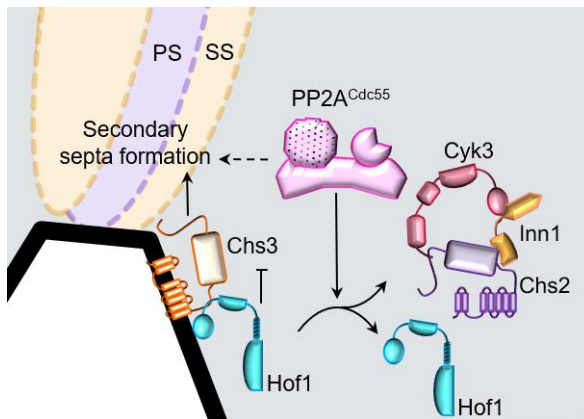

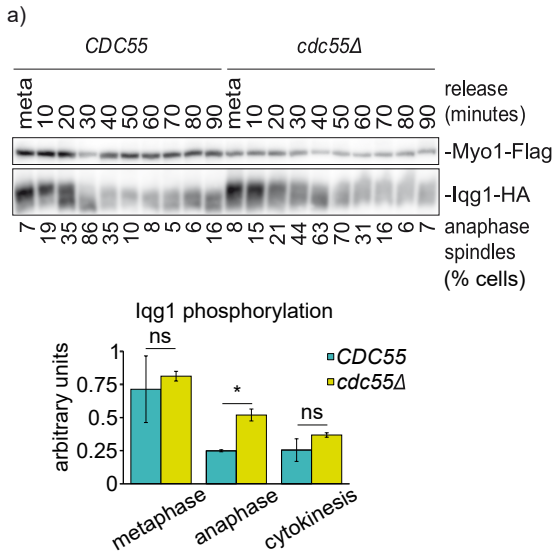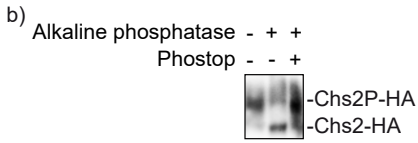

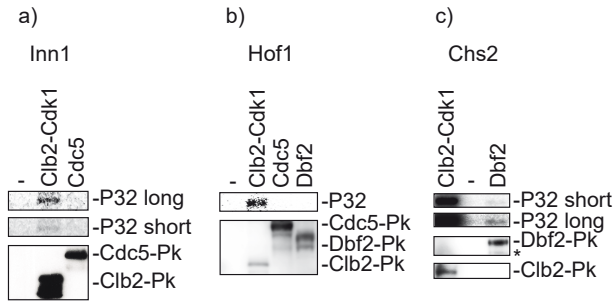

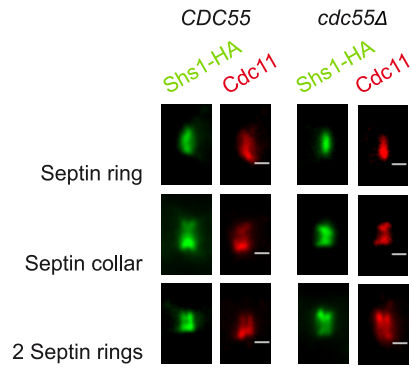

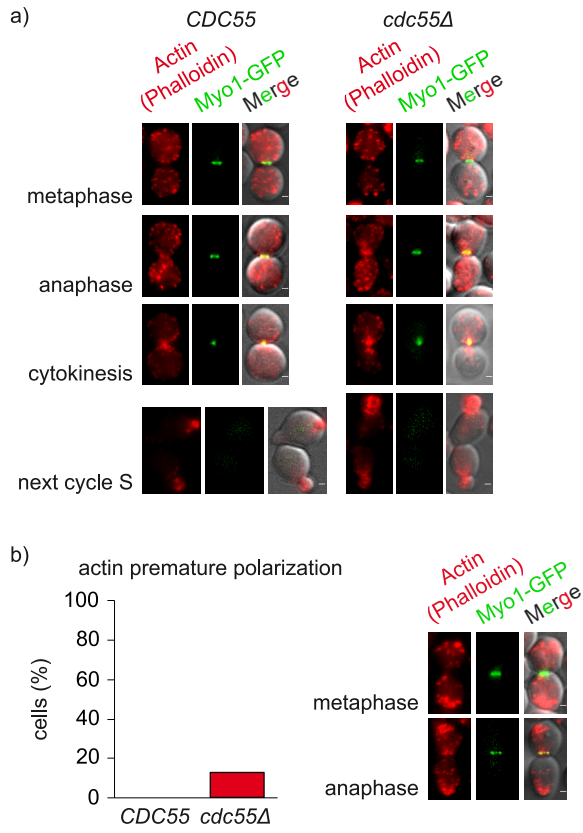

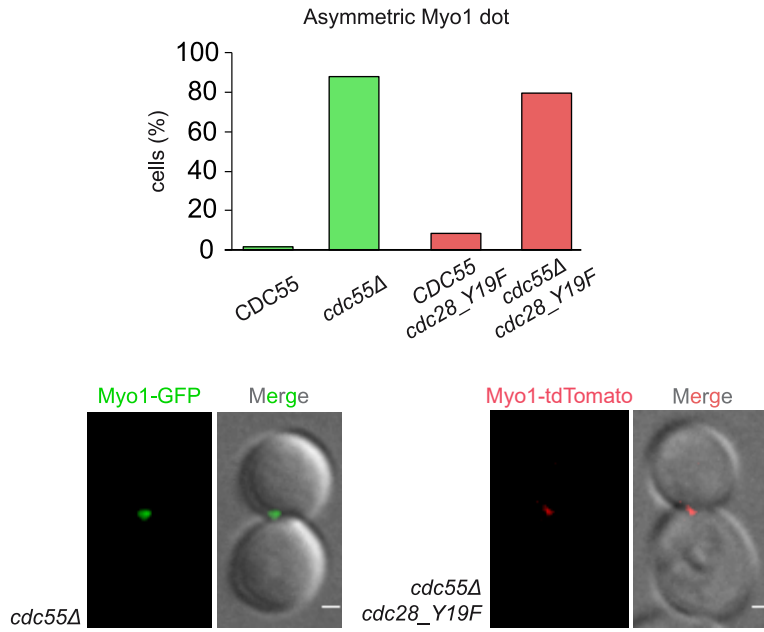



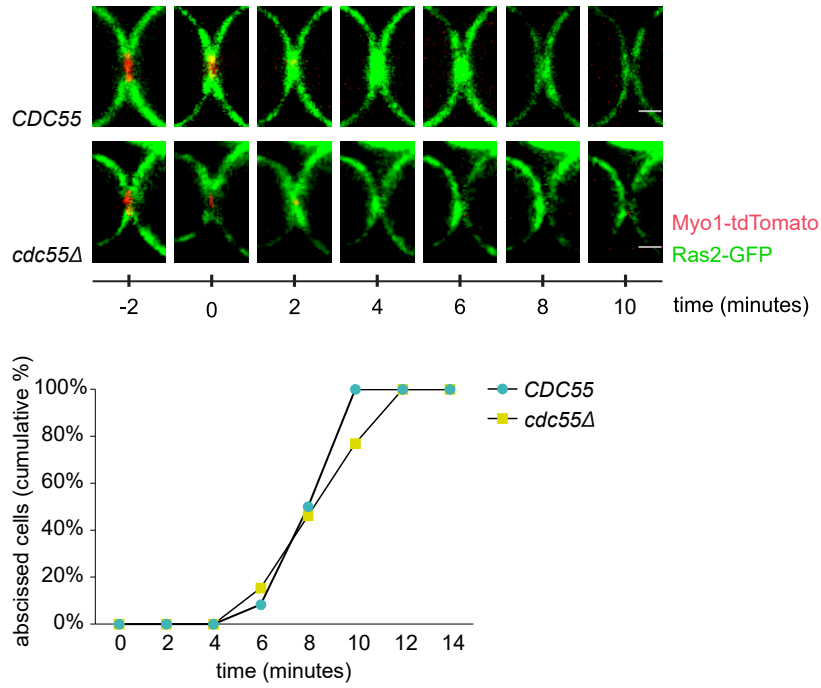

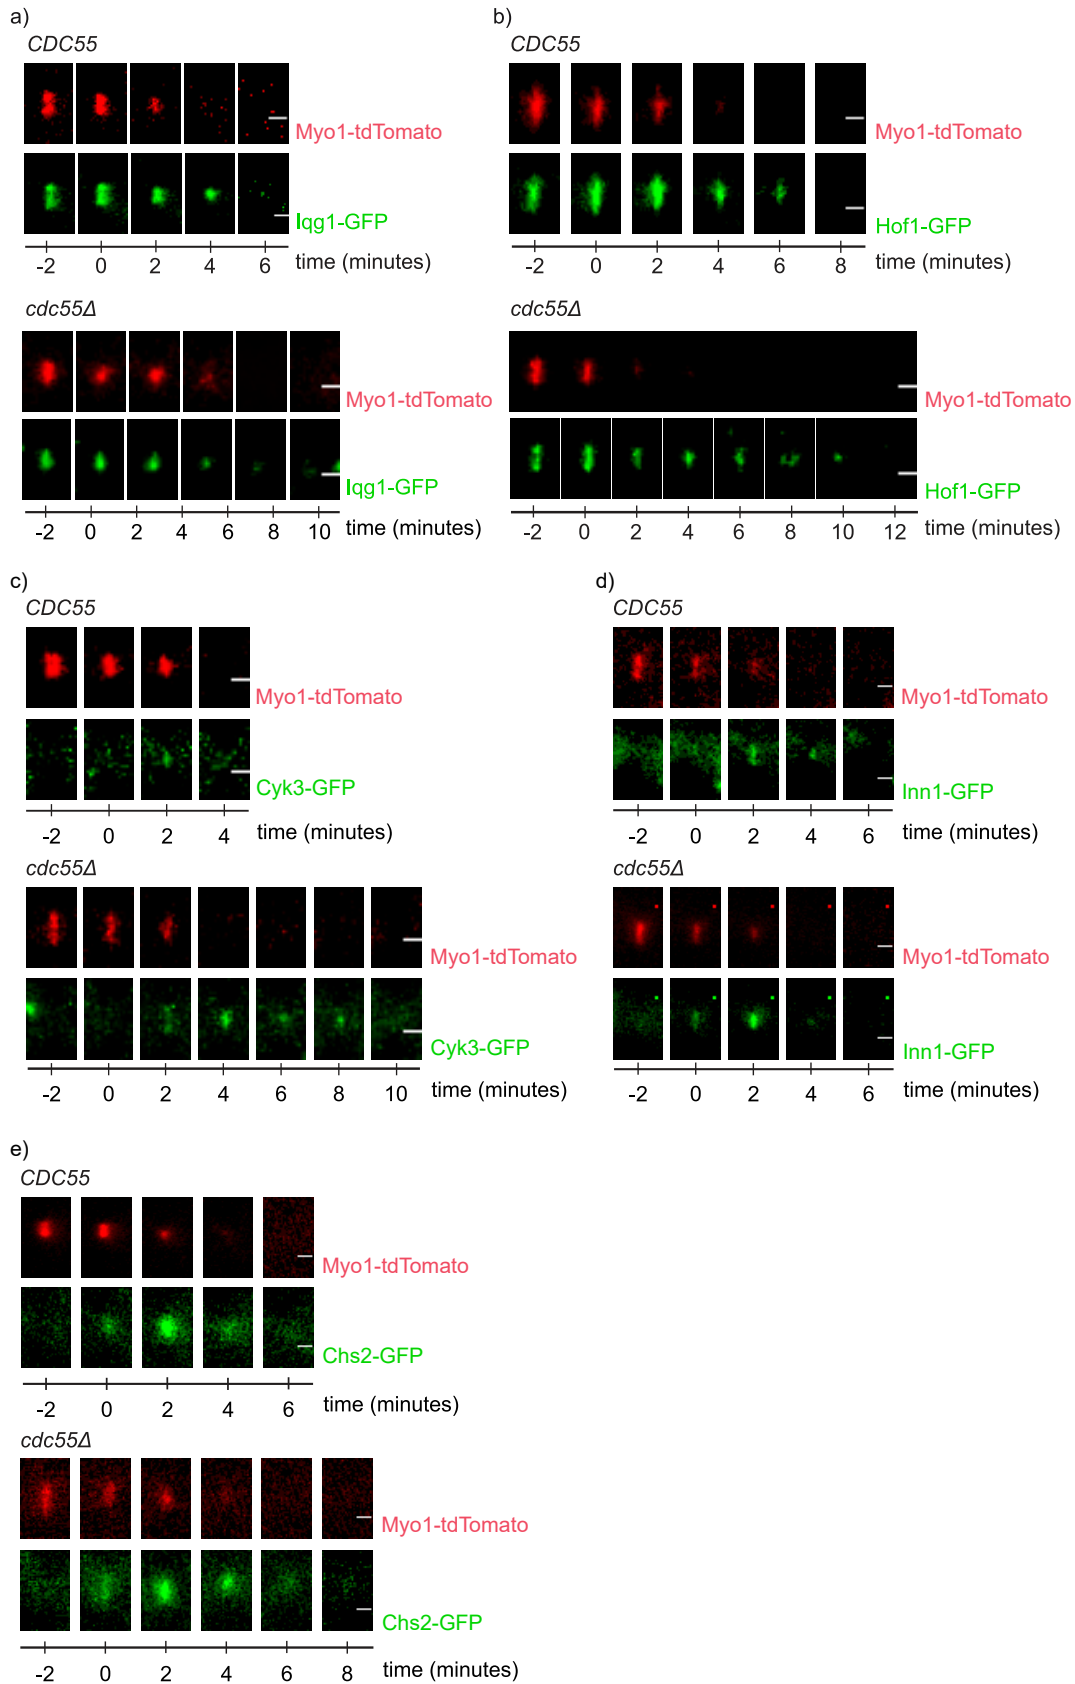

Table S1. List of strains used in this study

| Strain | Genotype                                                                    | Origin          |
|--------|-----------------------------------------------------------------------------|-----------------|
| W303   | <i>MATa ade2-1 trp1-1 can1-100 leu2-3,112 his3-11,15 ura3 GAL psi+</i>      | Matt Sullivan   |
| Y688   | <i>MATa MET-HA3-CDC20 GAL1-FLAG-ESP1-CBD-C1531A CLB2-PK3 BFA1-HA6</i>       | This laboratory |
| Y824   | <i>MATα MET-HA3-CDC20</i>                                                   | This laboratory |
| Y844   | <i>MATα cdc55Δ</i>                                                          | This laboratory |
| Y1306  | <i>MATα MET-HA3-CDC20 MYO1-TOMATOE SPC42-GFP HOF1-GFP</i>                   | This study      |
| Y1312  | <i>MATa MET-HA3-CDC20 INN1-HA6 cdc55Δ</i>                                   | This study      |
| Y1314  | <i>MATa MET-HA3-CDC20 HOF1-HA6</i>                                          | This study      |
| Y1315  | <i>MATα MET-HA3-CDC20 CHS2-HA6 cdc55Δ</i>                                   | This study      |
| Y1318  | <i>MATa MET-HA3-CDC20 CHS2-HA6</i>                                          | This study      |
| Y1357  | <i>MATa MET-HA3-CDC20 cdc5-as NET1-MYC9 CDC5 (5'UTR):CDC5-MYC9 DBF2-PK6</i> | This study      |
| Y1394  | <i>MATα MET-HA3-CDC20 HOF1-HA6 cdc55Δ</i>                                   | This study      |
| Y1423  | <i>MATa MET-HA3-CDC20 HOF1-HA6 PK3-CDC55</i>                                | This study      |
| Y1434  | <i>MATa MET-HA3-CDC20 MYO1-GFP cdc55Δ</i>                                   | This study      |
| Y1435  | <i>MATa MET-HA3-CDC20 MYO1-GFP</i>                                          | This study      |
| Y1437  | <i>MATa MET-HA3-CDC20 CYK3-HA6</i>                                          | This study      |
| Y1438  | <i>MATa MET-HA3-CDC20 CYK3-HA6 cdc55Δ</i>                                   | This study      |
| Y1454  | <i>MATa MET-HA3-CDC20 MYO1-TOMATOE SPC42-GFP INN1-GFP</i>                   | This study      |
| Y1491  | <i>MATa MET-HA3-CDC20 MYO1-FLAG IQG1-HA6 HOF1-MYC9</i>                      | This study      |
| Y1497  | <i>MATα MET-HA3-CDC20 MYO1-FLAG IQG1-HA6 cdc55Δ</i>                         | This study      |
| Y1512  | <i>MATa MET-HA3-CDC20 MYO1-TOMATOE SPC42-GFP cdc55Δ</i>                     | This study      |
| Y1516  | <i>MATa MET-HA<sub>3</sub>-CDC20 CHS2-GFP SPC42-GFP</i>                     | This study      |
| Y1565  | <i>MATa MET-HA3-CDC20 CYK3-HA6 PK3-CDC55</i>                                | This study      |
| Y1566  | <i>MATa MET-HA3-CDC20 INN1-HA6 PK3-CDC55</i>                                | This study      |
| Y1567  | <i>MATa MET-HA3-CDC20 CHS2-HA6 PK3-CDC55</i>                                | This study      |
| Y1572  | <i>MATa MET-HA3-CDC20 MYO1-TOMATOE SPC42-GFP yE-GFP-IQG1</i>                | This study      |
| Y1574  | <i>MATa MET-HA3-CDC20 MYO1-TOMATOE SPC42-GFP CYK3-GFP</i>                   | This study      |
| Y1575  | <i>MATa MET-HA3-CDC20 MYO1-TOMATOE CHS2-GFP cdc55Δ</i>                      | This study      |
| Y1576  | <i>MATα MET-HA3-CDC20 MYO1-TOMATOE SPC42-GFP CHS2-GFP</i>                   | This study      |
| Y1578  | <i>MATa MET-HA3-CDC20 MYO1-TOMATOE HOF1-GFP cdc55Δ</i>                      | This study      |
| Y1588  | <i>MATa MET-HA3-CDC20 SHS1-HA6</i>                                          | This study      |
| Y1589  | <i>MATa MET-HA3-CDC20 SHS1-HA6 cdc55Δ</i>                                   | This study      |
| Y1596  | <i>MATα MET-HA3-CDC20 MYO1-TOMATOE chs3Δ cdc55Δ</i>                         | This study      |
| Y1604  | <i>MATa MET-HA3-CDC20 MYO1-TOMATOE SPC42-GFP CYK3-GFP cdc55Δ</i>            | This study      |
| Y1605  | <i>MATα MET-HA3-CDC20 MYO1-TOMATOE chs3Δ</i>                                | This study      |

|       |                                                                                                      |                      |
|-------|------------------------------------------------------------------------------------------------------|----------------------|
| Y1606 | <i>MATa MET-HA3-CDC20 MYO1-TOMATOE SPC42-GFP yE-GFP-IQG1 cdc55Δ</i>                                  | This study           |
| Y1608 | <i>MATa MET-HA3-CDC20 MYO1-TOMATOE SPC42-GFP INN1-GFP cdc55Δ</i>                                     | This study           |
| Y1639 | <i>MATa MET-HA3-CDC20 CYK3-HA6 INN1-Myc9</i>                                                         | This study           |
| Y1640 | <i>MATa MET-HA3-CDC20 CYK3-HA6 INN1-Myc9 cdc55Δ</i>                                                  | This study           |
| Y1652 | <i>MATa MET-HA3-CDC20 MYO1-TOMATOE cdc55Δ URA3::HA3-CDC55</i>                                        | This laboratory      |
| Y1653 | <i>MATa MET-HA3-CDC20 MYO1-TOMATOE cdc55Δ URA3::HA3-CDC55-T174E S301D</i>                            | This laboratory      |
| Y1708 | <i>MATa MET-HA3-CDC20 MYO1-TOMATOE 3GFP-RAS2 cdc55Δ</i>                                              | This study           |
| Y1717 | <i>MATa MET-HA3-CDC20 MYO1-TOMATOE 3GFP-RAS2</i>                                                     | This study           |
| Y1725 | <i>MATa MET-HA3-CDC20 MYO1-TOMATOE CDC15-eGFP cdc55Δ cdc28-Y19F</i>                                  | This study           |
| Y1728 | <i>MATa ADH1-AtTIR1-MYC9 hof1-aid</i>                                                                | Alberto Sánchez-Díaz |
| Y1730 | <i>MATa GAL1-UBR1 ADH1-AtTIR1-MYC9 td-cyk3-aid</i>                                                   | Alberto Sánchez-Díaz |
| Y1747 | <i>MATa GAL1-UBR1 ADH1-AtTIR1-MYC9 td-cyk3-aid cdc55Δ</i>                                            | This study           |
| Y1749 | <i>MATa ADH1-AtTIR1-MYC9 hof1-aid cdc55Δ</i>                                                         | This study           |
| Y1761 | <i>MATa MYO1-TOMATOE CDC15-eGFP cdc28-Y19F</i>                                                       | This study           |
| Y1788 | <i>MATα MET-HA3-CDC20 MYO1-TOMATOE SPC42-GFP pGPD1-OsTIR1-MYC9 cdc55-aid</i>                         | This study           |
| Y2231 | <i>MATa MET-HA3-CDC20 CDC5-PK3 CDC14-HA6</i>                                                         | This laboratory      |
| Y1852 | <i>MATa MET-HA3-CDC20 MYO1-TOMATOE GAL-CHS2-YFP cdc55Δ</i>                                           | This study           |
| Y1853 | <i>MATa MET-HA3-CDC20 MYO1-TOMATOE SPC42-GFP GAL-CHS2-YFP</i>                                        | This study           |
| Y1855 | <i>MATa MET-HA3-CDC20 MYO1-TOMATOE SPC42-GFP GAL-chs2-S14E-S60E-S69E-S86E-S100E-S133E-YFP</i>        | This study           |
| Y1857 | <i>MATa MET-HA3-CDC20 MYO1-TOMATOE SPC42-GFP GAL-chs2-S14A-S60A-S69A-S86A-S100A-S133A-YFP cdc55Δ</i> | This study           |
